# Supplementary material for: PDGF‐BB‐Dependent Neurogenesis Buffers Depressive‐Like Behaviors by Inhibition of GABAergic Projection from Medial Septum to Dentate Gyrus
Source: PubMed Central journal article supplement (PMC10401107; doi:10.1002/advs.202301110), 2023-06-16
Supplement: ADVS-10-2301110-s001.pdf [file ADVS-10-2301110-s001.pdf]

## Supporting Information

for *Adv. Sci.*, DOI 10.1002/adv.202301110

PDGF-BB-Dependent Neurogenesis Buffers Depressive-Like Behaviors by Inhibition of GABAergic Projection from Medial Septum to Dentate Gyrus

*Hou-Hong Li, Yang Liu, Hong-Sheng Chen, Ji Wang, Yu-Ke Li, Yang Zhao, Rui Sun, Jin-Gang He, Fang Wang\* and Jian-Guo Chen\**

## **Supporting information**

# **PDGF-BB-Dependent Neurogenesis Buffers Depressive-Like Behaviors by Inhibition of GABAergic Projection from Medial Septum to Dentate Gyrus**

Hou-Hong Li<sup>1</sup>, Yang Liu<sup>1</sup>, Hong-Sheng Chen<sup>1,2</sup>, Ji Wang<sup>1</sup>, Yu-Ke Li<sup>1</sup>, Yang Zhao<sup>1</sup>, Rui Sun<sup>1</sup>, Jin-Gang He<sup>1,2,3,4</sup>, Fang Wang<sup>1,2,3,4,\*</sup>, Jian-Guo Chen<sup>1,2,3,4,\*</sup>

## Supplementary Figures

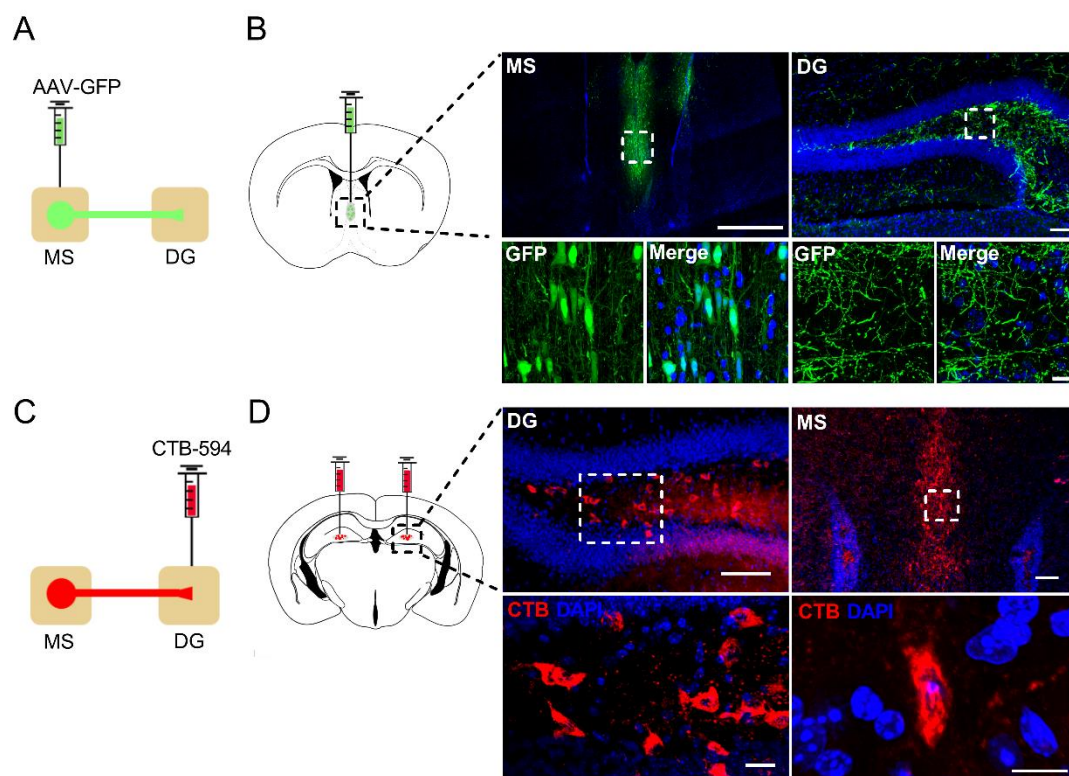

**Suppl. Fig. 1 Monosynaptic connection of MS neurons to DG neurons.** (A) Schematic of virus injections strategy. (B) Images showing GFP expression in the MS (left, green) and GFP-labeled MS axons in the DG (right, green). Top: Scale bar = 1000  $\mu\text{m}$  (left), 100  $\mu\text{m}$  (right). Below: Scale bar = 20  $\mu\text{m}$ . (C) Schematic of CTB injections strategy. (D) Images showing CTB expression in the DG (left, red) and retrograde labeled neurons in the MS (right, red). Left: Scale bar = 1000  $\mu\text{m}$  (top), 100  $\mu\text{m}$  (bottom). Right: Scale bar = 100  $\mu\text{m}$  (top), 10  $\mu\text{m}$  (bottom).

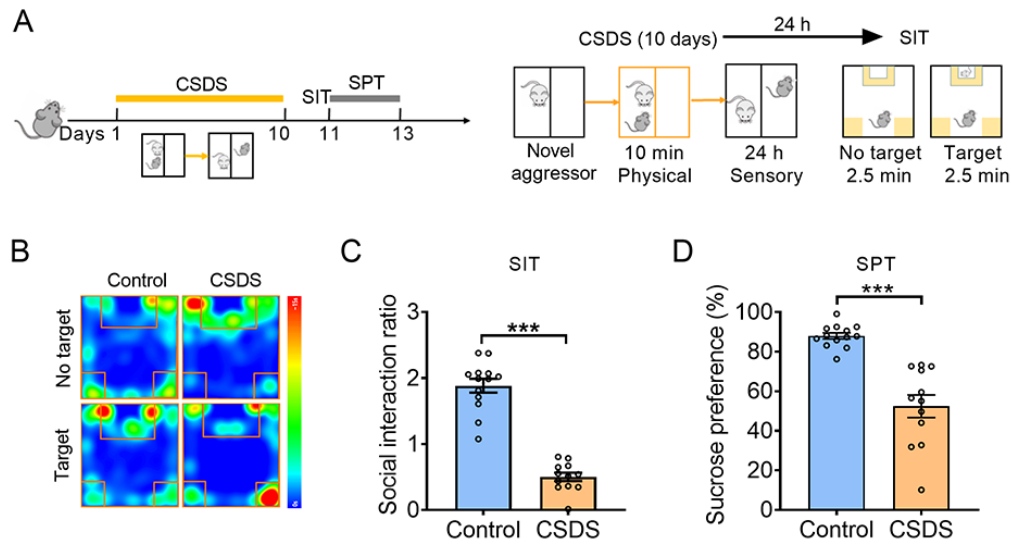

**Suppl. Fig. 2** Chronic social defeat stress induces depressive-like behaviors in mice. **(A)** Experimental timeline and behavioral paradigm of CSDS experiments. **(B)** Representative heatmaps of social avoidance behavioral test. **(C)** Depressive-like behaviors in stressed mice, as measured by the social interaction ratio in SIT after CSDS.  $n = 12-13$  per group. **(D)** Depressive-like behaviors in stressed mice, as measured by the sucrose preference in SPT after CSDS.  $n = 12-13$  per group. Data are expressed as mean  $\pm$  SEM. Student's  $t$  test (C, D). \*\*\* $P < 0.001$ . The statistical details can be found in Supplementary Table S4.

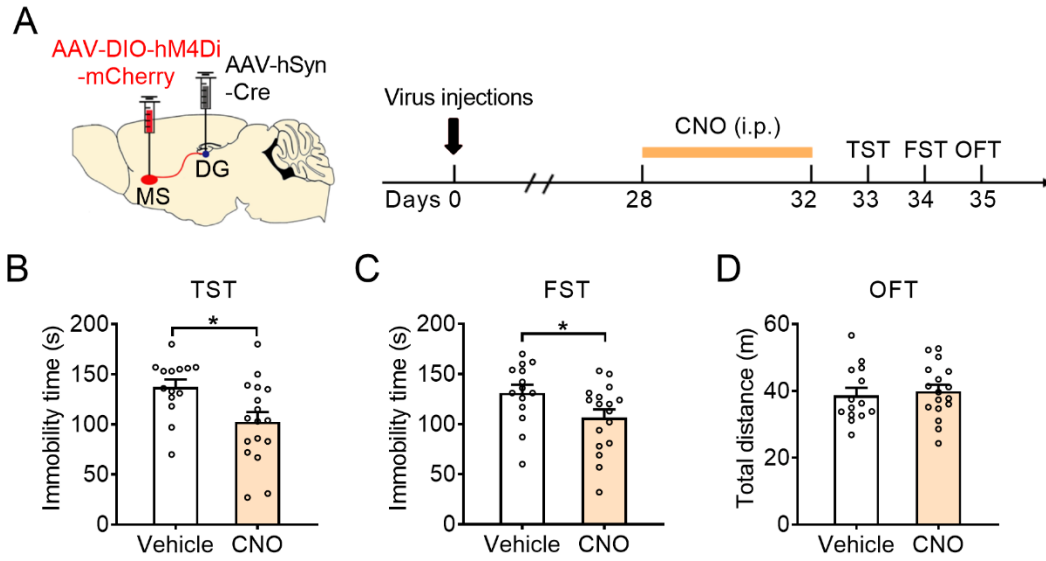

**Suppl. Fig. 3 Chemogenetic inhibition of MS-DG projections produces antidepressant effect in naïve mice. (A)** Schematic of the stereotaxic injections for selective expression of the hM4Di mCherry in MS-DG projection neurons. **(B)** Behavioral effects of the chemogenetic inhibition of MS-DG projection neurons in the TST.  $n = 14-17$  per group. **(C)** Behavioral effects of the chemogenetic inhibition of MS-DG projection neurons in the FST.  $n = 14-17$  per group. **(D)** Behavioral effects of the chemogenetic inhibition of MS-DG projection neurons in the OFT.  $n = 14-17$  per group. Data are expressed as mean  $\pm$  SEM. Student's  $t$  test (B-D).  $*P < 0.05$ . The statistical details can be found in Supplementary Table S4.

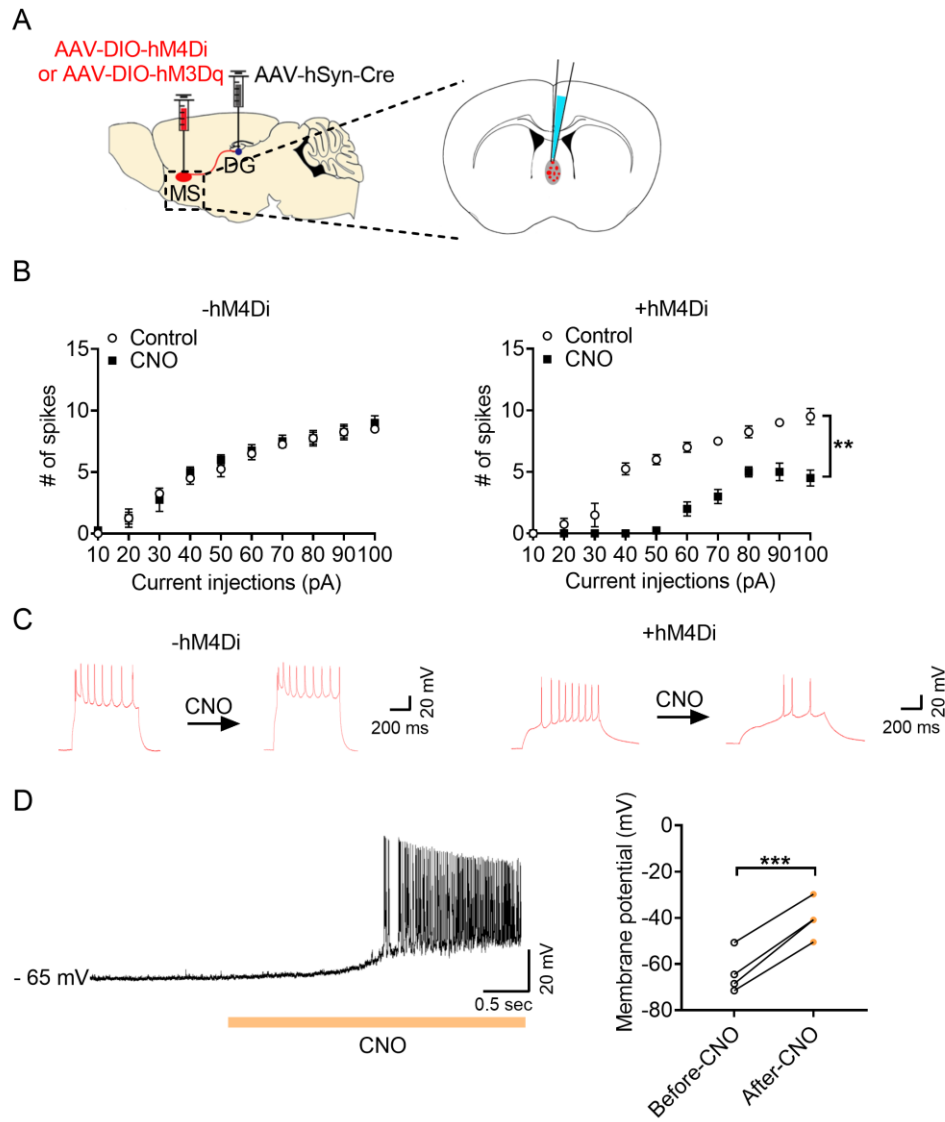

**Suppl. Fig. 4 Electrophysiological recording of MS neurons after exogenous expression DREADDs with bath application of CNO. (A)** Schematics showing viral vector AAV-hM4Di(hM3Dq)-mCherry infusion in MS and patch-clamp recordings from DG-projecting MS neurons. **(B)** Electrophysiological recording showed the firing of MS neurons expressing hM4Di-mCherry in the presence of 10  $\mu$ M CNO. n = 4 cells from three mice per group. **(C)** Patch-clamp recording from neurons expressing hM4Di-mCherry in the MS with representative trace of CNO-induced action potential firing in neurons expressing hM4Di-mCherry. **(D)** Patch clamp recording from neurons expressing hM3Dq-mCherry in the MS with representative trace of CNO-induced firing of action potential in neurons expressing hM3Dq-mCherry. Right: Summary of change

in resting membrane potential following bath application of CNO.  $n = 4$  cells from three mice per group. Data are expressed as mean  $\pm$  SEM. Student's  $t$  test (B, D).  $**P < 0.01$ ,  $***P < 0.001$ . The statistical details can be found in Supplementary Table S4.

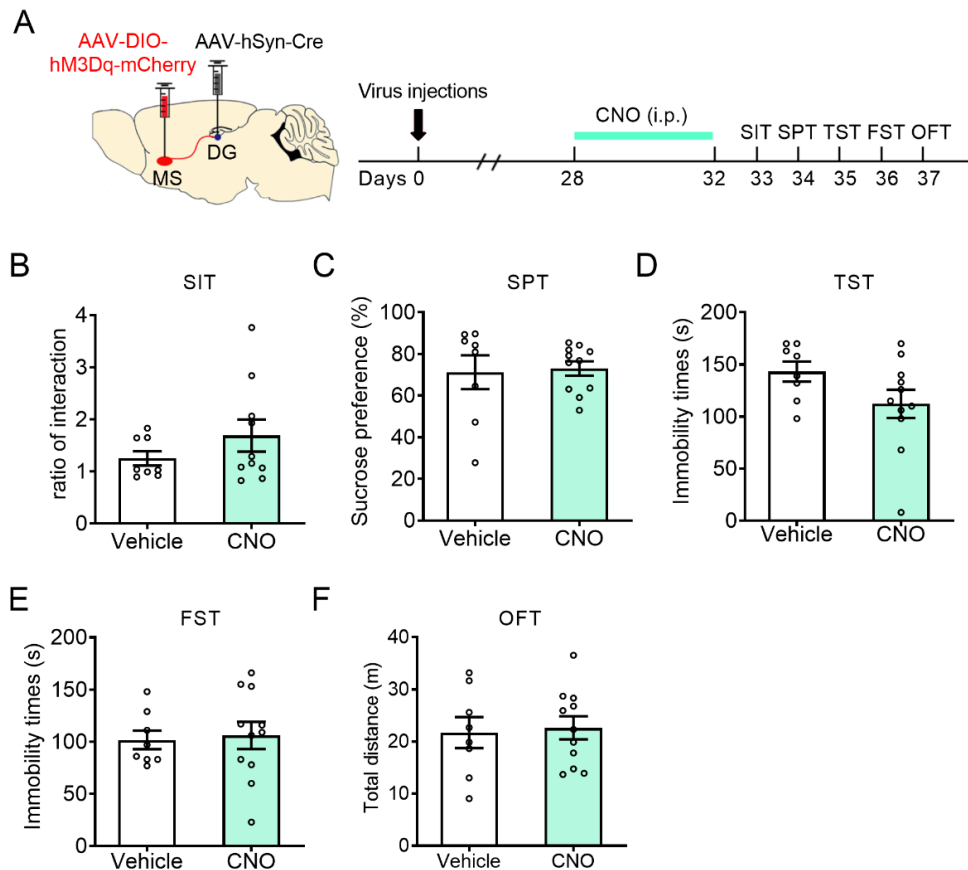

**Suppl. Fig. 5 Chemogenetic activation of MS-DG projections has no effects on depressive-like behaviors in naïve mice.** (A) Schematic of the stereotaxic injections for selective expression of the hM3Dq-mCherry in MS-DG projection neurons. (B) Behavioral effects of the chemogenetic activation of MS-DG projection neurons in the SIT.  $n = 8-10$  per group. (C) Behavioral effects of the chemogenetic activation of MS-DG projection neurons in the SPT.  $n = 8-11$  per group. (D) Behavioral effects of the chemogenetic activation of MS-DG projection neurons in the TST.  $n = 8-11$  per group. (E) Behavioral effects of the chemogenetic activation of MS-DG projection neurons in the FST.  $n = 8-11$  per group. (F) Behavioral effects of the chemogenetic activation of MS-DG projection neurons in the OFT.  $n = 8-11$  per group. Data are expressed as mean  $\pm$  SEM. Student's  $t$  test (B-F). The statistical details can be found in Supplementary Table S4.



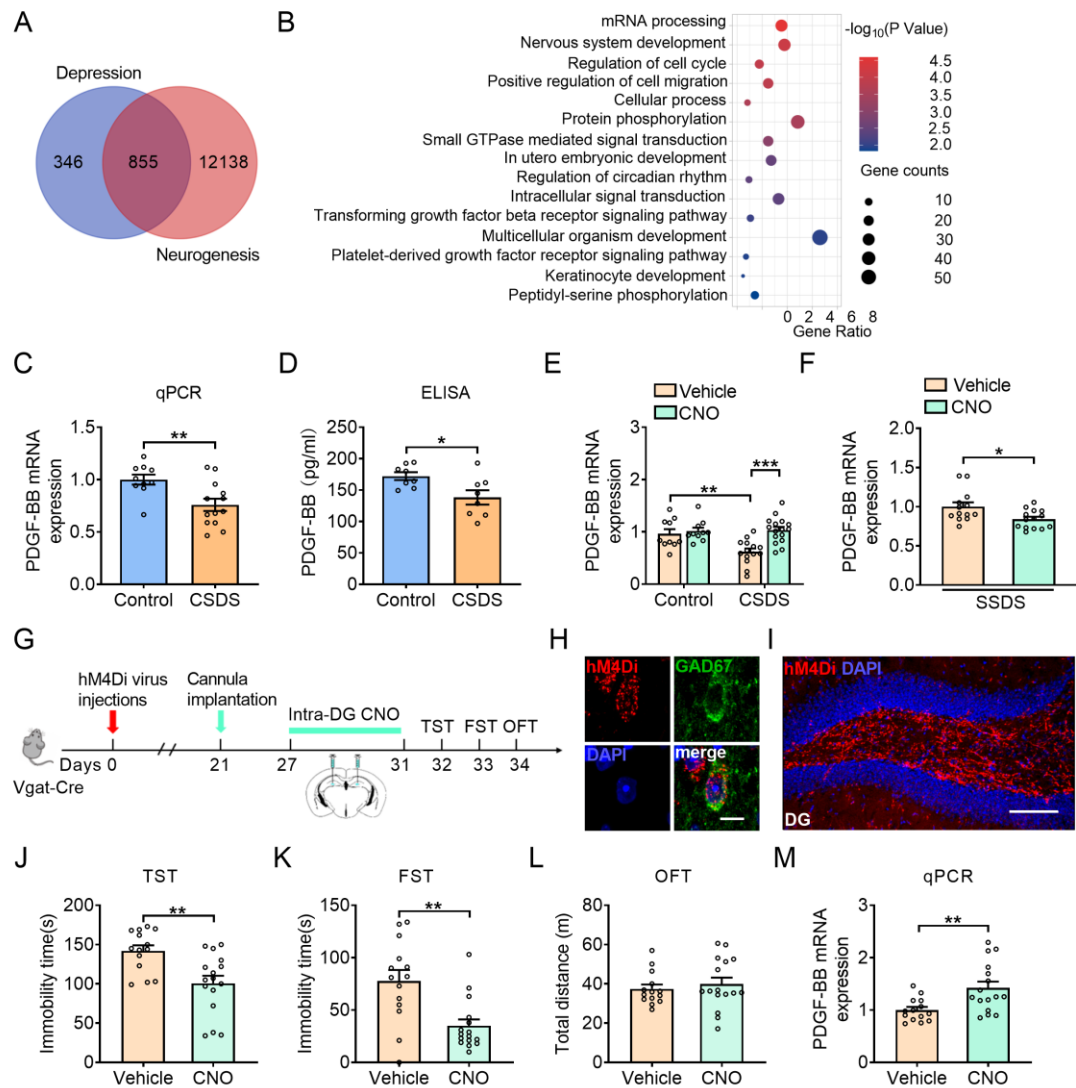

**Suppl. Fig. 6. Inhibition of MS<sup>GABA+</sup>-DG projection induces the expression of PDGF-BB and prevents depression-like behaviors.** (A) Venn diagram showing the overlap of DEGs in the depression and neurogenesis samples. (B) KEGG analysis of the 855 genes. (C) PDGF-BB mRNA expression in the DG after CSDS. n = 10-13 per group. (D) PDGF-BB protein levels in the DG as determined by ELISA after CSDS. n = 8 per group. (E) PDGF-BB mRNA expression in the DG after inhibition of MS-DG projection. n = 10-16 per group. (F) PDGF-BB mRNA expression in the DG after activation of MS-DG projection. n = 13-14 per group. (G) Timeline of experimental procedure. (H) Representative images showed that hM4Di-mCherry labeled neurons in the MS expressing GAD67. Scale bars: 10  $\mu$ m. (I) Confocal fluorescent image showing the distribution of GABAergic axon fibers, which expressed hM4Di-mCherry and

innervated hippocampal DG regions. Scale bars: 100  $\mu\text{m}$ . **(J)** Effects of chemogenetic inhibition of MS-DG GABAergic neurons on the immobility time in TST.  $n = 14-16$  per group. **(K)** Effects of chemogenetic inhibition of MS-DG GABAergic neurons on the immobility time in FST.  $n = 14-16$  per group. **(L)** Effects of chemogenetic inhibition of MS-DG GABAergic neurons on the locomotor activity in the OFT.  $n = 14-16$  per group. **(M)** PDGF-BB mRNA expression in the DG after inhibition of MS<sup>GABA+</sup>-DG projection in the Vgat-Cre mice.  $n = 14-16$  per group. Data are expressed as mean  $\pm$  SEM. Student's *t* test (C, D, F, J-M). Two-way ANOVA followed by the Bonferroni's post hoc test (E). \* $P < 0.05$ , \*\* $P < 0.01$ , \*\*\* $P < 0.001$ . The statistical details can be found in Supplementary Table S4.

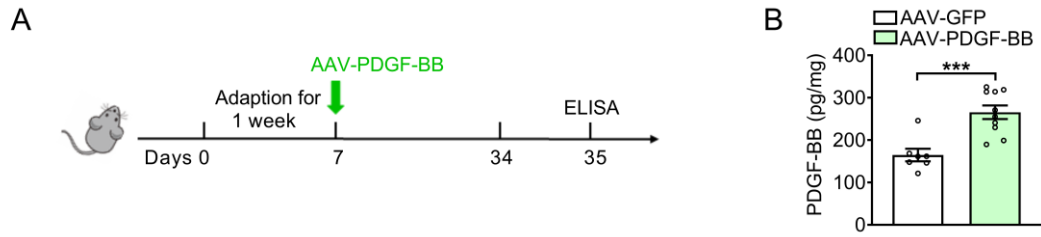

**Suppl. Fig. 7 PDGF-BB overexpression in DG after virus injection in naïve mice.**

(A) Experimental timeline of PDGF-BB overexpression in the DG and behavioral test.

(B) PDGF-BB protein levels in the DG as determined by ELISA four weeks after injection with AAV-GFP or AAV-PDGF-BB.  $n = 7-10$  per group. Data are expressed as mean  $\pm$  SEM. Student's  $t$  test. \*\*\* $P < 0.001$ . The statistical details can be found in Supplementary Table S4.

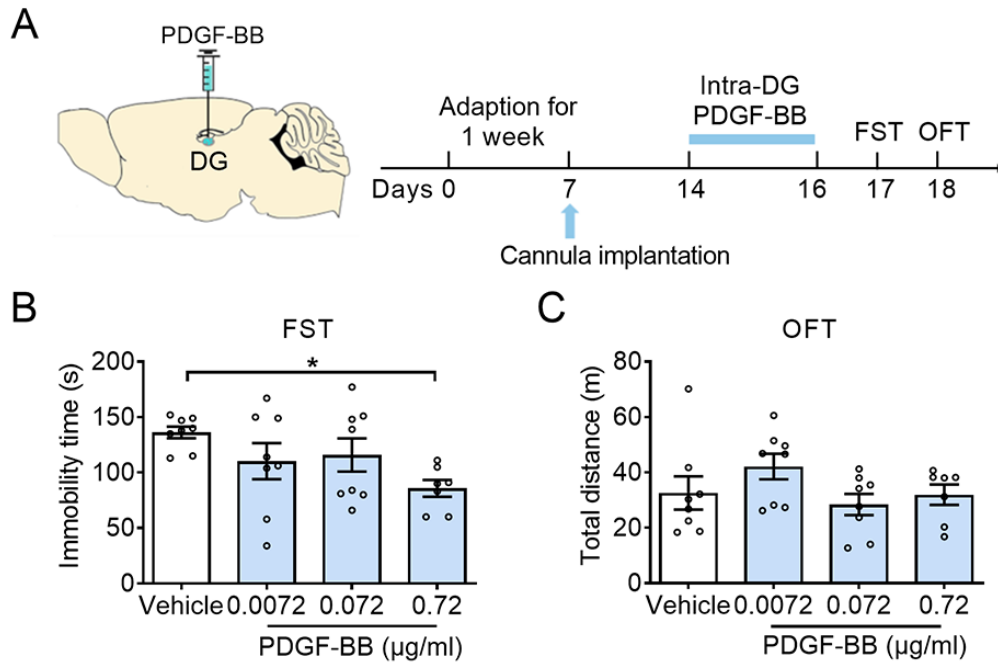

**Suppl. Fig. 8 The antidepressant effects of local injection of PDGF-BB into the DG.**

(A) Experimental timeline for behavioral testing after intra-hippocampal infusion of vehicle and PDGF-BB. (B) Time spent immobile in the FST following vehicle or PDGF-BB treatment.  $n = 7-8$  per group. (C) Locomotor activity measured by the total distance traveled by the naïve mice with vehicle or PDGF-BB treatment.  $n = 7-8$  per group. Data are expressed as mean  $\pm$  SEM. One-way ANOVA followed by Tukey's post hoc test (B, C).  $*P < 0.05$ . The statistical details can be found in Supplementary Table S4.

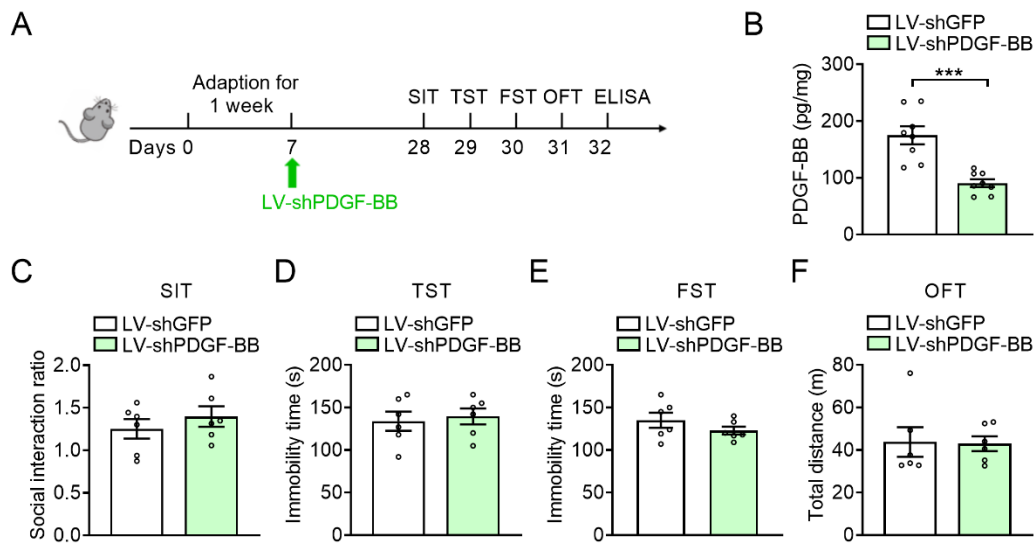

**Suppl. Fig. 9 Knockdown of PDGF-BB in the DG of naïve mice does not induce depressive-like phenotypes.** (A) Experimental timeline of PDGF-BB knockdown in the DG and behavioral test. (B) PDGF-BB protein levels in the DG as determined by ELISA three weeks after injection with LV-shGFP or LV-shPDGF-BB.  $n = 8$  per group. (C) Behavioral effects of PDGF-BB knockdown in the SIT.  $n = 6$  per group. (D) Behavioral effects of PDGF-BB knockdown in the TST.  $n = 6$  per group. (E) Behavioral effects of PDGF-BB knockdown in the FST.  $n = 6$  per group. (F) Behavioral effects of PDGF-BB knockdown in the OFT.  $n = 6$  per group. Data are expressed as mean  $\pm$  SEM. Student's  $t$  test (B-F). \*\*\* $P < 0.001$ . The statistical details can be found in Supplementary Table S4.

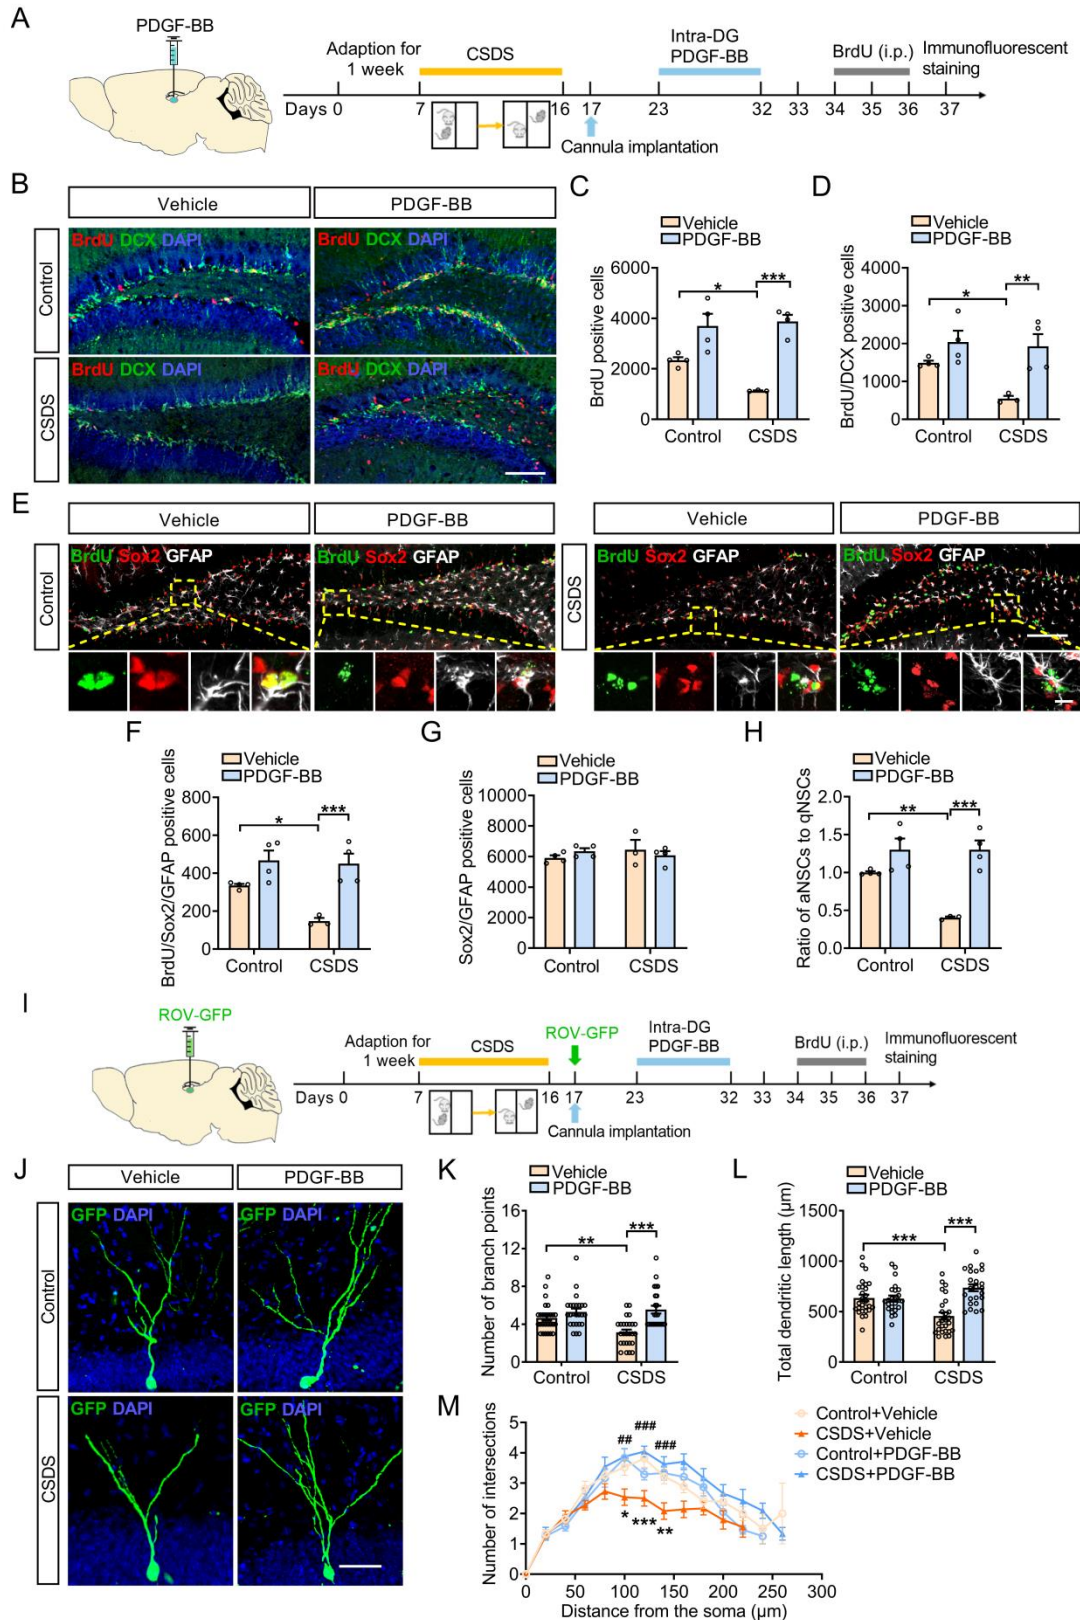

**Suppl. Fig. 10 Treatment with PDGF-BB reverses CSDS-induced alteration of hippocampal neurogenesis in the DG. (A) Experimental timelines for CSDS protocol, PDGF-BB treatment, and the BrdU injection protocol. (B) Immunofluorescence images**

for BrdU (red), DCX (green) within the SGZ of the hippocampus in control or CSDS-exposed mice treated with vehicle or PDGF-BB. Scale bars: 100  $\mu$ m. (C) Quantification of the number of BrdU positive cells in SGZ of the hippocampus after PDGF-BB treatment. n = 3-4 per group. (D) Quantification of the number of BrdU/DCX positive cells in SGZ of the hippocampus after PDGF-BB treatment. n = 3-4 per group. (E) Immunofluorescence images for BrdU (green), Sox2 (red), and GFAP (white) within the SGZ of the hippocampus in control or defeated mice treated with vehicle or PDGF-BB. Panels on the below are magnified images showing that the colocalization of BrdU with GFAP and Sox2. Scale bar: 100  $\mu$ m (top), 10  $\mu$ m (below). (F) Quantification of the number of BrdU/Sox2/GFAP positive NSCs in SGZ of the hippocampus after PDGF-BB treatment. n = 3-4 per group. (G) Quantification of the number of Sox2/GFAP positive NSCs in SGZ of the hippocampus after PDGF-BB treatment. n = 3-4 per group. (H) The ratio of aNSCs to qNSCs. n = 3-4 per group. (I) Experimental timelines for CSDS protocol, PDGF-BB treatment, and the virus injection protocol. (J) Representative images of ROV-GFP labeled newborn neurons in vehicle- or PDGF-BB-treated mice 4 weeks after retrovirus injection. Scale bars: 50  $\mu$ m. (K) Quantification of branch number of ROV-GFP labeled newborn neurons in vehicle- or PDGF-BB-treated mice 4 weeks after retrovirus injection. n = 24-27 neurons per group. (L) Quantification of dendritic length of ROV-GFP labeled newborn neurons in vehicle- or PDGF-BB-treated mice 4 weeks after retrovirus injection. n = 24-27 neurons per group. (M) Sholl analysis of dendritic complexity of ROV-GFP labeled newborn neurons in vehicle- or PDGF-BB-treated mice 4 weeks after retrovirus injection. n = 24-27 neurons per group. Data are expressed as mean  $\pm$  SEM. Two-way ANOVA followed by the Bonferroni's post hoc test (C, D, F-H, K-M). \* $P$  < 0.05; \*\* $P$  < 0.01; \*\*\* $P$  < 0.001. ## $P$  < 0.01, ### $P$  < 0.001 vs CSDS + Vehicle. The statistical details can be found in Supplementary Table S4.

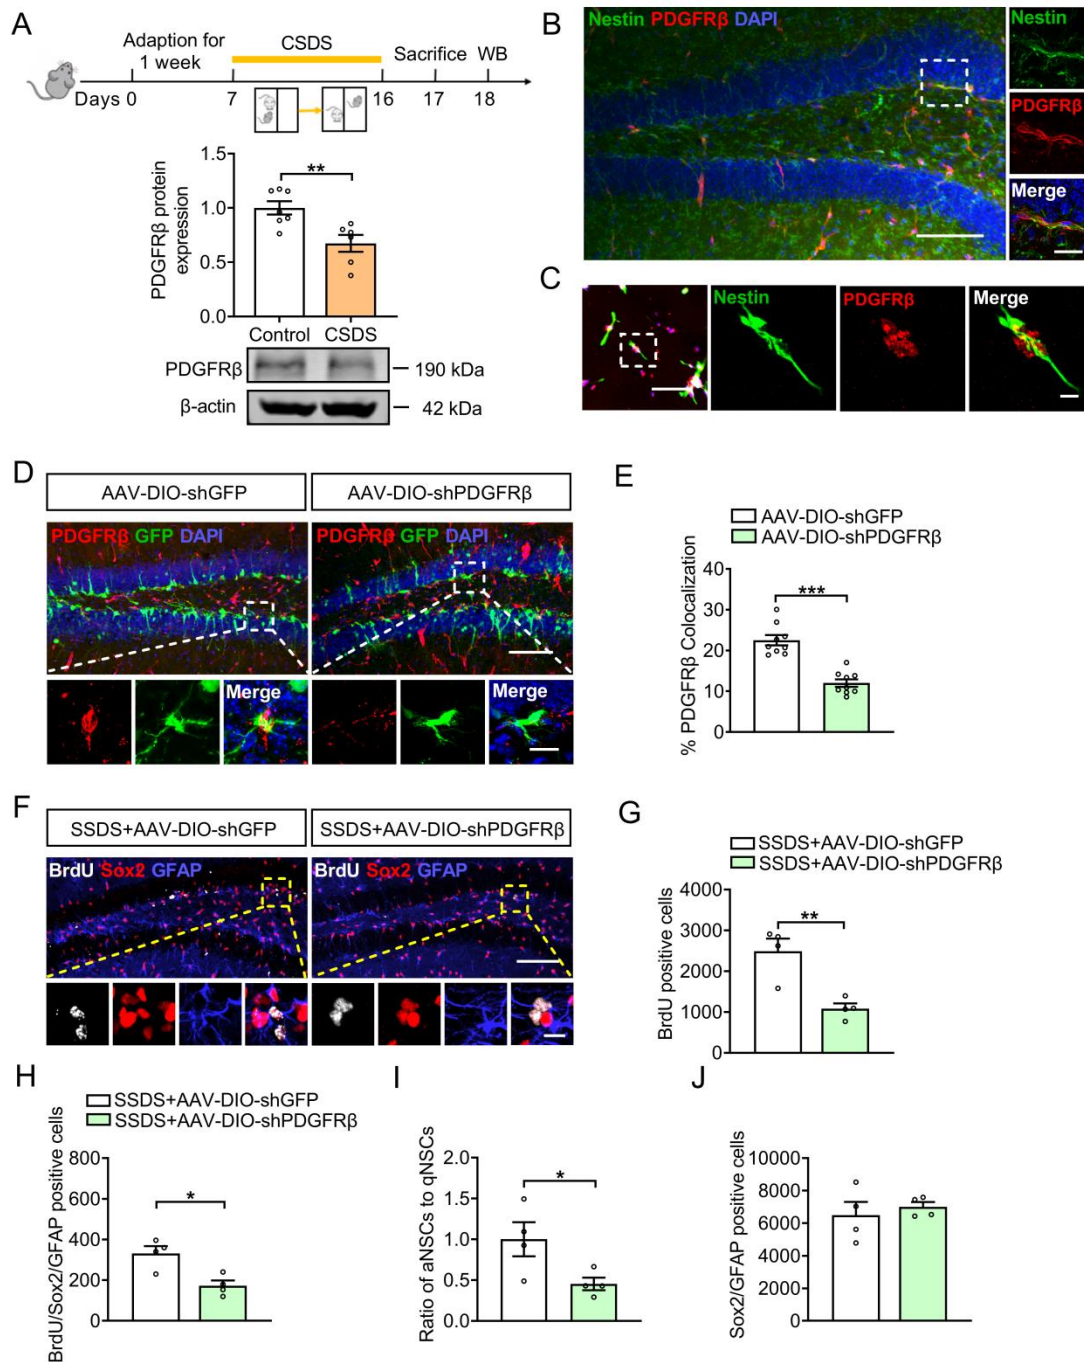

**Suppl. Fig. 11 Deletion of PDGFRβ from NSCs impairs hippocampal neurogenesis.**

(A) Experimental timeline of CSDS experiments and the change in levels of PDGFRβ protein in the DG after CSDS. n = 6-7 per group. (B) Double-labeled confocal immunofluorescence images showing the colocalization of PDGFRβ (red) expression with Nestin (green). Top images: Scale bar = 100 μm, Bottom images: Scale bar = 20 μm. (C) Immunohistochemistry for Nestin (green), PDGFRβ (red) nuclear counterstaining with DAPI (blue). Left images: Scale bar = 100 μm. Right images:



Scale bar = 10  $\mu\text{m}$ . **(D)** Representative confocal micrographs of DG from control mice (left) or mice injected with AAV-DIO-shPDGFR $\beta$  (right), showing transduced cells marked by GFP (green) and PDGFR $\beta$  protein detected by immunolabeling (red). Top images: Scale bar = 100  $\mu\text{m}$ , Bottom images: Scale bar = 20  $\mu\text{m}$ . **(E)** Quantification of PDGFR $\beta$  neurons colocalized with GFP.  $n = 9$  slices per group. **(F)** Immunohistochemistry for BrdU (white), Sox2 (red), and GFAP (blue) within the SGZ of the hippocampus in AAV-DIO-shGFP or AAV-DIO-shPDGFR $\beta$ -injected mice. Top images: Scale bar = 100  $\mu\text{m}$ . Bottom images: Scale bar = 10  $\mu\text{m}$ . **(G)** Quantification of the number of BrdU positive cells in DG of the hippocampus in AAV-DIO-shGFP or AAV-DIO-shPDGFR $\beta$ -injected mice.  $n = 4$  per group. **(H)** Quantification of the number of BrdU/Sox2/GFAP positive NSCs in SGZ of the hippocampus in AAV-DIO-shGFP or AAV-DIO-shPDGFR $\beta$ -injected mice.  $n = 4$  per group. **(I)** The ratio of aNSCs to qNSCs.  $n = 4$  per group. **(J)** Quantification of the number of Sox2/GFAP positive NSCs in SGZ of the hippocampus in AAV-DIO-shGFP or AAV-DIO-shPDGFR $\beta$ -injected mice.  $n = 4$  per group. Data are expressed as mean  $\pm$  SEM. Student's  $t$  test (A, E, G-J). \* $P < 0.05$ ; \*\* $P < 0.01$ ; \*\*\* $P < 0.001$ . The statistical details can be found in Supplementary Table S4.

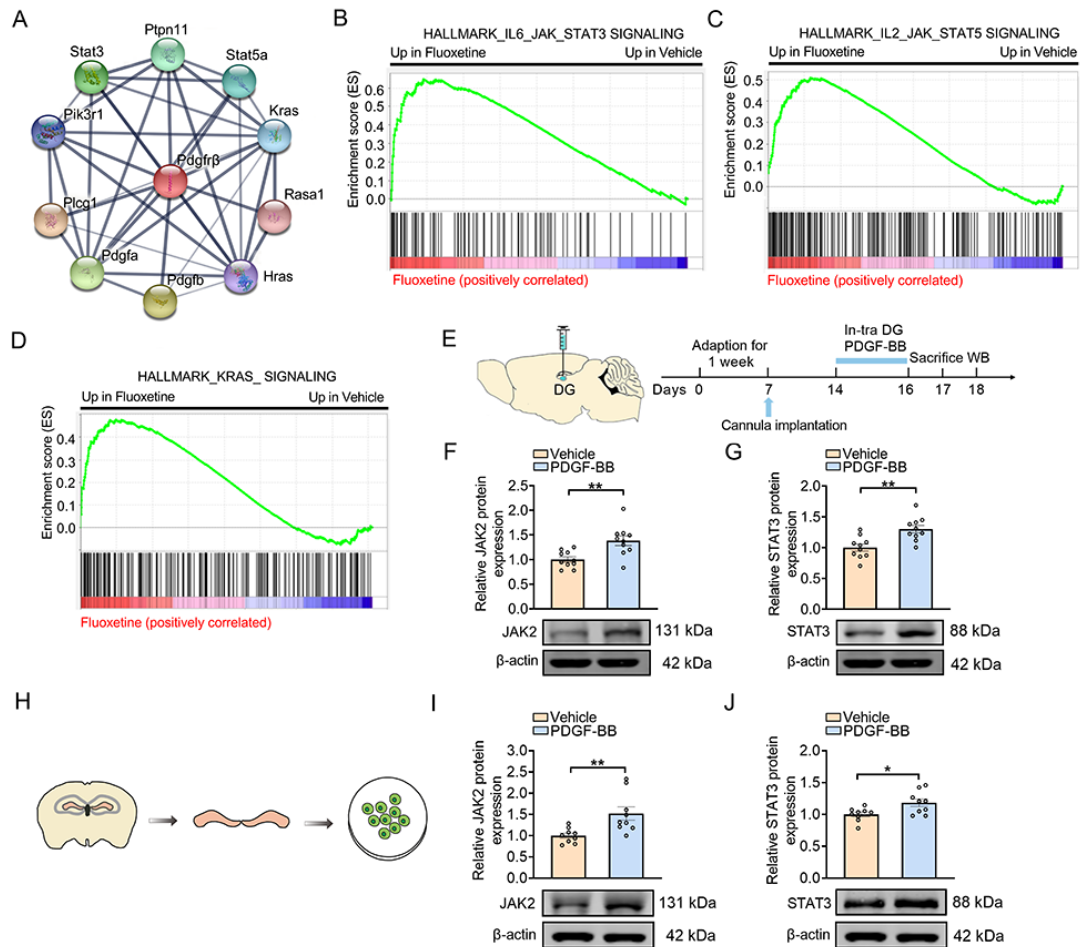

**Suppl. Fig. 12 JAK2/STAT3 is involved in the antidepressant action mediated by PDGF-BB/PDGFR $\beta$  signaling pathway.** (A) Functional protein association network plotted by using the STRING database. (B-D) GSEA plot of proteins expressed in fluoxetine-treated mice for the list of STAT3, STAT5, KRAS. (E) Experimental timeline for behavioral testing after intra-hippocampal infusion of vehicle and PDGF-BB. (F) The change of protein levels of JAK2 in the DG after PDGF-BB treatment.  $n = 10$  per group. (G) The change of protein levels of STAT3 in the DG after PDGF-BB treatment.  $n = 10$  per group. (H) Schematics of the experiments. (I) The change of protein levels of JAK2 in the DG after PDGF-BB treatment.  $n = 9$  per group. (J) The change of protein levels of STAT3 in the DG after PDGF-BB treatment.  $n = 9$  per group. Data are expressed as mean  $\pm$  SEM. \* $P < 0.05$ , \*\* $P < 0.01$ , \*\*\* $P < 0.01$ . Student's  $t$  test (F, G, I, J). The statistical details can be found in Supplementary Table S4.

## Uncropped scans of key western blots

Figure S11A

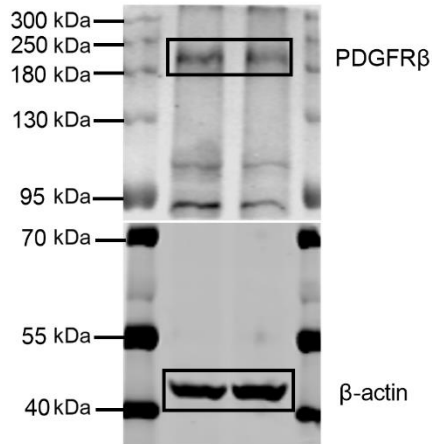

Figure S12F and Figure S12G

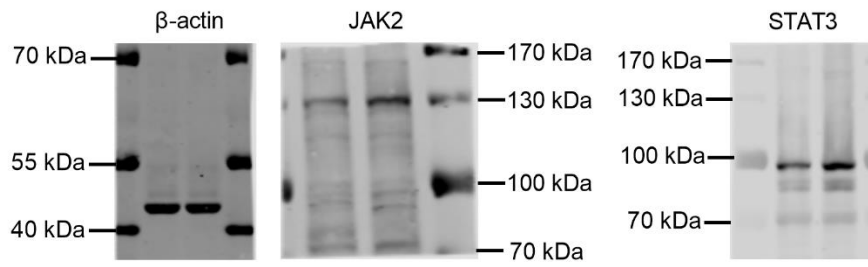

Figure S12I and Figure S12J

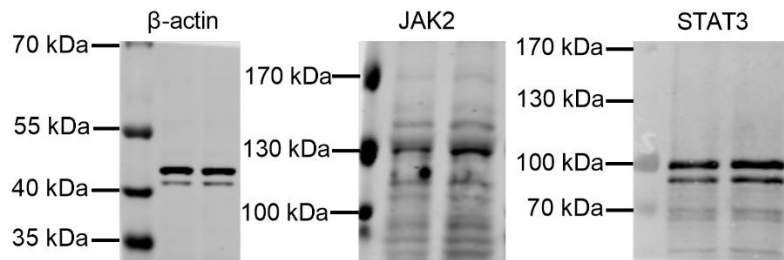

**Supplementary Table S1. All primers used.**

| Names      | Sequences (5' to 3')    |
|------------|-------------------------|
| PDGF-BB-R: | TACGGAGTCTCTGTGCAGCAGGC |
| PDGF-BB-F: | AGTCGGCATGAATCGCTGCTGGG |
| GAPDH-R:   | ATGGTGAAGGTCGGTGTG      |
| GAPDH-F:   | CATTCTCGGCCTTACTG       |

**Supplementary Table S2. All antibodies and drugs used.**

| <b>Antibodies</b>                                | <b>SOURCE</b>             | <b>IDENTIFIER</b> |
|--------------------------------------------------|---------------------------|-------------------|
| Anti-PDGFR $\beta$                               | Cell Signaling Technology | Cat# 3169         |
| Anti-PDGFR $\beta$                               | Abcam                     | Cat# ab32570      |
| Anti-GFAP                                        | Cell Signaling Technology | Cat# 3670         |
| Anti-Sox2                                        | Abcam                     | Cat# ab97959      |
| Anti-BrdU                                        | Abcam                     | Cat# ab6326       |
| Anti-DCX                                         | Cell Signaling Technology | Cat# 4604         |
| Anti-Nestin                                      | Millipore                 | Cat# MAB353       |
| Anti-CTB                                         | Abnova                    | Cat# PAB13910     |
| Anti- $\beta$ -actin                             | Cell Signaling Technology | Cat# 8480         |
| Anti-Somatostatin-28                             | Synaptic Systems          | Cat# 366004       |
| Anti-Cholecystokinin 8                           | Abcam                     | Cat# ab37274      |
| Anti-C-FOS                                       | Abcam                     | Cat# ab190289     |
| Anti-CCK                                         | Abcam                     | Cat# ab37274      |
| Anti-CaMKII $\alpha$                             | Cell Signaling Technology | Cat# 50049        |
| Anti-VIP                                         | Santa cruz biotechnology  | Cat# sc-25347     |
| Anti-GAD67                                       | Abcam                     | Cat# ab26116      |
| Anti-JAK2                                        | Proteintech               | Cat# 17670-1-AP   |
| Anti-STAT3                                       | Proteintech               | Cat# 10253-2-AP   |
| CTB-555                                          | BrainVTA                  | Cat# 210127       |
| Alex Fluor 488-conjugated donkey anti-mouse IgG  | Invitrogen                | Cat# A32766       |
| Alex Fluor 488-conjugated donkey anti-rabbit IgG | Invitrogen                | Cat# A21206       |
| Alex Fluor 594-conjugated donkey anti-rabbit IgG | Invitrogen                | Cat# A21207       |
| Alex Fluor 647-conjugated donkey anti-rat IgG    | Jackson ImmunoResearch    | Cat# 712-605-153  |
| Alex Fluor 405-conjugated donkey anti-mouse IgG  | Abcam                     | Cat# ab175660     |
| Alex Fluor 647-conjugated donkey anti-rabbit IgG | Invitrogen                | Cat# A31573       |

**Supplementary Table S3. All bacterial and virus Strains used.**

|                                                        |                          |           |
|--------------------------------------------------------|--------------------------|-----------|
| AAV-EF1a-DIO-hM4D(Gi)-mCherry                          | Obio Technology Shanghai | HYMBH2481 |
| AAV-EF1a-DIO-hM3D(Gq)-mCherry                          | Obio Technology Shanghai | HYMBH2482 |
| AAV-hSyn-Cre                                           | Obio Technology Shanghai | CN867     |
| pROV-U6-shRNA-EF1a(S)-EGFP                             | Obio Technology Shanghai | CN889     |
| qAkd-cmv-bGlobin-Flex-EGFP-MIR30shRNA (pdgfr $\beta$ ) | Obio Technology Shanghai | Y10057    |
| LV-U6-shPdgfb-Ubi-EGFP                                 | Genechem Shanghai        | 81302-13  |
| LV-U6-shPdgfb-Ubi-mcherry                              | Genechem Shanghai        | 92846-1   |
| LV-Ubi-Pdgfb- Ubi-EGFP                                 | Genechem Shanghai        | 45561-1   |
| AAV-CMV-Pdgfb-EGFP                                     | Genechem Shanghai        | 46612-1   |
| AAV-CMV-Pdgfb-mCherry                                  | Genechem Shanghai        | 61989-2   |

**Supplementary Table S4. Statistical analysis for Figures 1-8 and Figures S1-10.**

| <b>Figure and numbers of animals or cells used</b>                                                                                                        | <b>Statistical analysis</b>                                                                                                                                                                               | <b>Post hoc tests</b>                                                                                                                                                                                                                                                                                              | <b>Mean ± SEM.</b>                                                                                                                                                                                                    |
|-----------------------------------------------------------------------------------------------------------------------------------------------------------|-----------------------------------------------------------------------------------------------------------------------------------------------------------------------------------------------------------|--------------------------------------------------------------------------------------------------------------------------------------------------------------------------------------------------------------------------------------------------------------------------------------------------------------------|-----------------------------------------------------------------------------------------------------------------------------------------------------------------------------------------------------------------------|
| <p><b>1D:</b> Behavioral test of SIT</p> <p>Control + Vehicle (n = 12)<br/>Control + CNO (n = 14)<br/>CSDS + Vehicle (n = 15)<br/>CSDS + CNO (n = 15)</p> | <p>Two-way ANOVA</p> <p>Stress: <math>F(1,52) = 4.8290, p = 0.0325</math><br/>Treatment: <math>F(1,52) = 1.2060, p = 0.2772</math><br/>Stress × Treatment: <math>F(1,52) = 7.5570, p = 0.0082</math></p>  | <p>Bonferroni's <i>post hoc</i> test</p> <p>Control + Vehicle versus CSDS + Vehicle, <math>p = 0.0024</math><br/>Control + CNO versus CSDS + CNO, <math>p &gt; 0.9999</math><br/>Control + Vehicle versus Control + CNO, <math>p = 0.5305</math><br/>CSDS + Vehicle versus CSDS + CNO, <math>p = 0.0133</math></p> | <p>Control + Vehicle <math>1.267 \pm 0.179</math><br/>Control + CNO <math>1.040 \pm 0.151</math><br/>CSDS + Vehicle <math>0.588 \pm 0.079</math><br/>CSDS + CNO <math>1.116 \pm 0.137</math></p>                      |
| <p><b>1E:</b> Behavioral test of TST</p> <p>Control + Vehicle (n = 12)<br/>Control + CNO (n = 14)<br/>CSDS + Vehicle (n = 15)<br/>CSDS + CNO (n = 15)</p> | <p>Two-way ANOVA</p> <p>Stress: <math>F(1,52) = 1.5620, p = 0.2170</math><br/>Treatment: <math>F(1,52) = 0.4100, p = 0.5248</math><br/>Stress × Treatment: <math>F(1,52) = 6.4500, p = 0.0141</math></p>  | <p>Bonferroni's <i>post hoc</i> test</p> <p>Control + Vehicle versus CSDS + Vehicle, <math>p = 0.0226</math><br/>Control + CNO versus CSDS + CNO, <math>p = 0.7117</math><br/>Control + Vehicle versus Control + CNO, <math>p = 0.4016</math><br/>CSDS + Vehicle versus CSDS + CNO, <math>p = 0.0466</math></p>    | <p><b>Mean ± s.e.m.</b></p> <p>Control + Vehicle <math>127.8 \pm 8.0</math><br/>Control + CNO <math>146.4 \pm 8.7</math><br/>CSDS + Vehicle <math>164.9 \pm 8.6</math><br/>CSDS + CNO <math>133.8 \pm 12.2</math></p> |
| <p><b>1F:</b> Behavioral test of FST</p> <p>Control + Vehicle (n = 12)<br/>Control + CNO (n = 14)<br/>CSDS + Vehicle (n = 15)<br/>CSDS + CNO (n = 15)</p> | <p>Two-way ANOVA</p> <p>Stress: <math>F(1,52) = 0.1686, p = 0.6830</math><br/>Treatment: <math>F(1,52) = 15.0300, p = 0.0003</math><br/>Stress × Treatment: <math>F(1,52) = 9.3560, p = 0.0035</math></p> | <p>Bonferroni's <i>post hoc</i> test</p> <p>Control + Vehicle versus CSDS + Vehicle, <math>p = 0.0396</math><br/>Control + CNO versus CSDS + CNO, <math>p = 0.1227</math><br/>Control + Vehicle</p>                                                                                                                | <p><b>Mean ± s.e.m.</b></p> <p>Control + Vehicle <math>111.9 \pm 7.5</math><br/>Control + CNO <math>102.6 \pm 15.4</math><br/>CSDS + Vehicle <math>151.5 \pm 9.4</math></p>                                           |

|                                                                                                                                                 |                                                                                                                                                                        |                                                                                                                                                                                                                                                                    |                                                                                                                                                                                   |
|-------------------------------------------------------------------------------------------------------------------------------------------------|------------------------------------------------------------------------------------------------------------------------------------------------------------------------|--------------------------------------------------------------------------------------------------------------------------------------------------------------------------------------------------------------------------------------------------------------------|-----------------------------------------------------------------------------------------------------------------------------------------------------------------------------------|
|                                                                                                                                                 |                                                                                                                                                                        | versus Control + CNO,<br>$p > 0.9999$<br>CSDS + Vehicle<br>versus CSDS + CNO,<br>$p < 0.001$                                                                                                                                                                       | CSDS + CNO 72.3<br>$\pm 10.8$                                                                                                                                                     |
| <b>1G:</b> Behavioral test of OFT<br><br>Control + Vehicle (n = 12)<br>Control + CNO (n = 14)<br>CSDS + Vehicle (n = 15)<br>CSDS + CNO (n = 15) | Two-way ANOVA<br><br>Stress: $F(1,52) = 0.6083, p = 0.4390$<br>Treatment: $F(1,52) = 2.9630, p = 0.0911$<br>Stress $\times$ Treatment: $F(1,52) = 0.01802, p = 0.8937$ | Bonferroni's <i>post hoc</i> test<br><br>Control + Vehicle versus CSDS + Vehicle,<br>$p > 0.9999$<br>Control + CNO versus CSDS + CNO,<br>$p > 0.9999$<br>Control + Vehicle versus Control + CNO, $p = 0.4224$<br>CSDS + Vehicle versus CSDS + CNO,<br>$p = 0.4975$ | <b>Mean <math>\pm</math> s.e.m.</b><br><br>Control + Vehicle 35.11 $\pm$ 3.21<br>Control + CNO 29.67 $\pm$ 3.37<br>CSDS + Vehicle 32.43 $\pm$ 3.04<br>CSDS + CNO 27.78 $\pm$ 1.99 |
| <b>1K:</b> Behavioral test of SIT<br><br>Vehicle (n = 19)<br>CNO (n = 20)                                                                       | Unpaired <i>t</i> test<br><br>$t = 2.0300, p = 0.0496$                                                                                                                 |                                                                                                                                                                                                                                                                    | <b>Mean <math>\pm</math> s.e.m.</b><br><br>Vehicle 1.408 $\pm$ 0.228<br>CNO 0.876 $\pm$ 0.136                                                                                     |
| <b>1L:</b> Behavioral test of TST<br><br>Vehicle (n = 19)<br>CNO (n = 20)                                                                       | Unpaired <i>t</i> test<br><br>$t = 2.7510, p = 0.0091$                                                                                                                 |                                                                                                                                                                                                                                                                    | <b>Mean <math>\pm</math> s.e.m.</b><br><br>Vehicle 130.1 $\pm$ 5.6<br>CNO 150.9 $\pm$ 5.1                                                                                         |
| <b>1M:</b> Behavioral test of FST<br><br>Vehicle (n = 19)<br>CNO (n = 20)                                                                       | Unpaired <i>t</i> test<br><br>$t = 3.7140, p = 0.0007$                                                                                                                 |                                                                                                                                                                                                                                                                    | <b>Mean <math>\pm</math> s.e.m.</b><br><br>Vehicle 97.8 $\pm$ 8.1<br>CNO 139.4 $\pm$ 7.8                                                                                          |
| <b>1N:</b> Behavioral test of OFT<br><br>Vehicle (n = 19)<br>CNO (n = 20)                                                                       | Unpaired <i>t</i> test<br><br>$t = 0.6909, p = 0.4939$                                                                                                                 |                                                                                                                                                                                                                                                                    | <b>Mean <math>\pm</math> s.e.m.</b><br><br>Vehicle 22.33 $\pm$ 1.87<br>CNO 20.68 $\pm$ 1.50                                                                                       |
| <b>2C:</b> DREADD inhibition of MS-DG GABAergic projections led to an                                                                           | Unpaired <i>t</i> test                                                                                                                                                 |                                                                                                                                                                                                                                                                    | <b>Mean <math>\pm</math> s.e.m.</b>                                                                                                                                               |



|                                                                                                                                                                              |                                                                                                             |                                                                                                     |                                                                                                            |
|------------------------------------------------------------------------------------------------------------------------------------------------------------------------------|-------------------------------------------------------------------------------------------------------------|-----------------------------------------------------------------------------------------------------|------------------------------------------------------------------------------------------------------------|
| <p>increment of c-Fos expression in DG.</p> <p>Vehicle (n = 3)<br/>CNO (n = 3)</p>                                                                                           | <p>t = 3.0440, p = 0.0383</p>                                                                               |                                                                                                     | <p>Vehicle 1150.0 ± 278.7<br/>CNO 2325.0 ± 266.9</p>                                                       |
| <p><b>2D:</b> DREADD inhibition of MS-DG GABAergic projections led to an increment of c-Fos expression in SOM positive neurons.</p> <p>Vehicle (n = 3)<br/>CNO (n = 3)</p>   | <p>Unpaired <i>t</i> test</p> <p>t = 2.8910, p = 0.0445</p>                                                 |                                                                                                     | <p><b>Mean ± s.e.m.</b></p> <p>Vehicle 153.3 ± 21.9<br/>CNO 527.7 ± 127.6</p>                              |
| <p><b>2F:</b> DREADD inhibition of MS-DG GABAergic projections led to an increment of PDGF-BB expression in DG.</p> <p>Vehicle (n = 3)<br/>CNO (n = 3)</p>                   | <p>Unpaired <i>t</i> test</p> <p>t = 4.8190, p = 0.0085</p>                                                 |                                                                                                     | <p><b>Mean ± s.e.m.</b></p> <p>Vehicle 1450.0 ± 531.5<br/>CNO 4040.0 ± 79.4</p>                            |
| <p><b>2G:</b> DREADD inhibition of MS-DG GABAergic projections led to an increment of PDGF-BB expression in SOM positive neurons.</p> <p>Vehicle (n = 3)<br/>CNO (n = 3)</p> | <p>Unpaired <i>t</i> test</p> <p>t = 10.8000, p = 0.0004</p>                                                |                                                                                                     | <p><b>Mean ± s.e.m.</b></p> <p>Vehicle 470.0 ± 189.3<br/>CNO 2523.0 ± 18.6</p>                             |
| <p><b>3C:</b> Behavioral test of SIT</p> <p>Control + AAV-GFP (n = 15)<br/>Control + AAV-PDGF-BB (n = 13)</p>                                                                | <p>Two-way ANOVA</p> <p>Stress: F (1,54) = 1.6910, p = 0.1990<br/>Virus: F (1,54) = 13.5900, p = 0.0005</p> | <p>Bonferroni's <i>post hoc</i> test</p> <p>Control + AAV-GFP versus CSDS + AAV-GFP, p = 0.0021</p> | <p><b>Mean ± s.e.m.</b></p> <p>Control + AAV-GFP 1.367 ± 0.162<br/>Control + AAV-PDGF-BB 1.382 ± 0.119</p> |

|                                                                                                                                                                           |                                                                                                                                                                  |                                                                                                                                                                                                                                                                                                  |                                                                                                                                                                           |
|---------------------------------------------------------------------------------------------------------------------------------------------------------------------------|------------------------------------------------------------------------------------------------------------------------------------------------------------------|--------------------------------------------------------------------------------------------------------------------------------------------------------------------------------------------------------------------------------------------------------------------------------------------------|---------------------------------------------------------------------------------------------------------------------------------------------------------------------------|
| <p>CSDS + AAV-GFP (n = 14)<br/>CSDS + AAV-PDGF-BB (n = 16)</p>                                                                                                            | <p>Stress × Virus: F (1,54) = 12.8700, p = 0.0007</p>                                                                                                            | <p>Control + AAV-PDGF-BB versus CSDS + AAV-PDGF-BB, p = 0.2249<br/>Control + AAV-GFP versus Control + AAV-PDGF-BB, p &gt; 0.9999<br/>CSDS + AAV-GFP versus CSDS + AAV-PDGF-BB, p &lt; 0.001</p>                                                                                                  | <p>CSDS + AAV-GFP 0.626 ± 0.146<br/>CSDS + AAV-PDGF-BB 1.729 ± 0.162</p>                                                                                                  |
| <p><b>3D:</b> Behavioral test of TST</p> <p>Control + AAV-GFP (n = 15)<br/>Control + AAV-PDGF-BB (n = 13)<br/>CSDS + AAV-GFP (n = 14)<br/>CSDS + AAV-PDGF-BB (n = 16)</p> | <p>Two-way ANOVA</p> <p>Stress: F (1,54) = 5.0870, p = 0.0282,<br/>Virus: F (1,54) = 40.8600, p &lt; 0.001<br/>Stress × Virus: F (1,54) = 7.8840, p = 0.0069</p> | <p>Bonferroni's <i>post hoc</i> test</p> <p>Control + AAV-GFP versus CSDS + AAV-GFP, p = 0.0014<br/>Control + AAV-PDGF-BB versus CSDS + AAV-PDGF-BB, p &gt; 0.9999<br/>Control + AAV-GFP versus Control + AAV-PDGF-BB, p = 0.0317<br/>CSDS + AAV-GFP versus CSDS + AAV-PDGF-BB, p &lt; 0.001</p> | <p><b>Mean ± s.e.m.</b></p> <p>Control + AAV-GFP 131.6 ± 4.3<br/>Control + AAV-PDGF-BB 104.9 ± 5.0<br/>CSDS + AAV-GFP 169.3 ± 6.4<br/>CSDS + AAV-PDGF-BB 100.8 ± 10.8</p> |
| <p><b>3E:</b> Behavioral test of FST</p> <p>Control + AAV-GFP (n = 15)<br/>Control + AAV-PDGF-BB (n = 13)<br/>CSDS + AAV-GFP (n = 14)<br/>CSDS + AAV-PDGF-BB (n = 16)</p> | <p>Two-way ANOVA</p> <p>Stress: F (1,54) = 0.1426, p = 0.7072<br/>Virus: F (1,54) = 7.4140, p = 0.0087<br/>Stress × Virus: F (1,54) = 23.5700, p &lt; 0.001</p>  | <p>Bonferroni's <i>post hoc</i> test</p> <p>Control + AAV-GFP versus CSDS + AAV-GFP, p = 0.0050<br/>Control + AAV-PDGF-BB versus CSDS + AAV-PDGF-BB, p = 0.0010<br/>Control + AAV-GFP versus Control + AAV-PDGF-BB, p = 0.2883</p>                                                               | <p><b>Mean ± s.e.m.</b></p> <p>Control + AAV-GFP 74.9 ± 10.6<br/>Control + AAV-PDGF-BB 96.5 ± 10.4<br/>CSDS + AAV-GFP 120.1 ± 11.6<br/>CSDS + AAV-PDGF-BB 43.6 ± 7.7</p>  |

|                                                                                                                                                                 |                                                                                                                                                                                |                                                                                                                                                                                                                                                                                           |                                                                                                                                                                                                   |
|-----------------------------------------------------------------------------------------------------------------------------------------------------------------|--------------------------------------------------------------------------------------------------------------------------------------------------------------------------------|-------------------------------------------------------------------------------------------------------------------------------------------------------------------------------------------------------------------------------------------------------------------------------------------|---------------------------------------------------------------------------------------------------------------------------------------------------------------------------------------------------|
|                                                                                                                                                                 |                                                                                                                                                                                | CSDS + AAV-GFP versus CSDS + AAV-PDGF-BB, $p < 0.001$                                                                                                                                                                                                                                     |                                                                                                                                                                                                   |
| <b>3F:</b> Behavioral test of OFT<br><br>Control + AAV-GFP (n = 15)<br>Control + AAV-PDGF-BB (n = 13)<br>CSDS + AAV-GFP (n = 14)<br>CSDS + AAV-PDGF-BB (n = 16) | Two-way ANOVA<br><br>Stress: $F(1,54) = 0.0012$ , $p = 0.9728$<br>Virus: $F(1,54) = 1.4050$ , $p = 0.2411$<br>Stress $\times$ Virus: $F(1,54) = 0.5903$ , $p = 0.4456$         | Bonferroni's <i>post hoc</i> test<br><br>Control + AAV-GFP versus CSDS + AAV-GFP, $p > 0.9999$<br>Control + AAV-PDGF-BB versus CSDS + AAV-PDGF-BB, $p > 0.9999$<br>Control + AAV-GFP versus Control + AAV-PDGF-BB, $p > 0.9999$<br>CSDS + AAV-GFP versus CSDS + AAV-PDGF-BB, $p = 0.3309$ | <b>Mean <math>\pm</math> s.e.m.</b><br><br>Control + AAV-GFP $43.90 \pm 3.28$<br>Control + AAV-PDGF-BB $45.57 \pm 5.42$<br>CSDS + AAV-GFP $40.97 \pm 4.00$<br>CSDS + AAV-PDGF-BB $48.77 \pm 3.33$ |
| <b>3H:</b> Behavioral test of SIT<br><br>Control + Vehicle (n = 12)<br>Control + PDGF-BB (n = 12)<br>CSDS + Vehicle (n = 12)<br>CSDS + PDGF-BB (n = 15)         | Two-way ANOVA<br><br>Stress: $F(1,47) = 25.8700$ , $p < 0.001$<br>Treatment: $F(1,47) = 3.1380$ , $p = 0.0830$<br>Stress $\times$ Treatment: $F(1,47) = 8.4590$ , $p = 0.0055$ | Bonferroni's <i>post hoc</i> test<br><br>Control + Vehicle versus CSDS + Vehicle, $p < 0.001$<br>Control + PDGF-BB versus CSDS + PDGF-BB, $p = 0.2408$<br>Control + Vehicle versus Control + PDGF-BB, $p = 0.8744$<br>CSDS + Vehicle versus CSDS + PDGF-BB, $p = 0.0028$                  | <b>Mean <math>\pm</math> s.e.m.</b><br><br>Control + Vehicle $1.263 \pm 0.089$<br>Control + PDGF-BB $1.125 \pm 0.111$<br>CSDS + Vehicle $0.297 \pm 0.064$<br>CSDS + PDGF-BB $0.862 \pm 0.161$     |
| <b>3I:</b> Behavioral test of TST<br><br>Control + Vehicle (n = 12)<br>Control + PDGF-BB (n = 12)<br>CSDS + Vehicle (n = 12)                                    | Two-way ANOVA<br><br>Stress: $F(1,47) = 0.3129$ , $p = 0.5785$<br>Treatment: $F(1,47) = 5.6880$ , $p = 0.0212$                                                                 | Bonferroni's <i>post hoc</i> test<br><br>Control + Vehicle versus CSDS + Vehicle, $p = 0.0218$<br>Control + PDGF-BB versus CSDS +                                                                                                                                                         | <b>Mean <math>\pm</math> s.e.m.</b><br><br>Control + Vehicle $124.4 \pm 5.5$<br>Control + PDGF-BB $132.3 \pm 8.1$                                                                                 |

|                                                                                                                                                         |                                                                                                                                                            |                                                                                                                                                                                                                                                                   |                                                                                                                                                            |
|---------------------------------------------------------------------------------------------------------------------------------------------------------|------------------------------------------------------------------------------------------------------------------------------------------------------------|-------------------------------------------------------------------------------------------------------------------------------------------------------------------------------------------------------------------------------------------------------------------|------------------------------------------------------------------------------------------------------------------------------------------------------------|
| CSDS + PDGF-BB (n = 15)                                                                                                                                 | Stress × Virus: F (1,47) = 10.8100, p = 0.0019                                                                                                             | PDGF-BB, p = 0.1068<br>Control + Vehicle versus Control + PDGF-BB, p > 0.9999<br>CSDS + Vehicle versus CSDS + PDGF-BB, p = 0.0003                                                                                                                                 | CSDS + Vehicle 158.2 ± 9.6<br>CSDS + PDGF-BB 108.4 ± 10.0                                                                                                  |
| <b>3J:</b> Behavioral test of FST<br><br>Control + Vehicle (n = 12)<br>Control + PDGF-BB (n = 12)<br>CSDS + Vehicle (n = 12)<br>CSDS + PDGF-BB (n = 15) | Two-way ANOVA<br><br>Stress: F (1,47) = 0.1019, p = 0.7510<br>Treatment: F (1,47) = 12.2400, p = 0.0010<br>Stress × Virus: F (1,47) = 12.6700, p = 0.0009; | Bonferroni's <i>post hoc</i> test<br><br>Control + Vehicle versus CSDS + Vehicle, p = 0.0206<br>Control + PDGF-BB versus CSDS + PDGF-BB, p = 0.0456<br>Control + Vehicle versus Control + PDGF-BB, p > 0.9999<br>CSDS + Vehicle versus CSDS + PDGF-BB, p < 0.001  | <b>Mean ± s.e.m.</b><br><br>Control + Vehicle 85.7 ± 10.8<br>Control + PDGF-BB 86.3 ± 8.0<br>CSDS + Vehicle 122.8 ± 9.0<br>CSDS + PDGF-BB 55.2 ± 9.8       |
| <b>3K:</b> Behavioral test of OFT<br><br>Control + Vehicle (n = 12)<br>Control + PDGF-BB (n = 12)<br>CSDS + Vehicle (n = 12)<br>CSDS + PDGF-BB (n = 15) | Two-way ANOVA<br><br>Stress: F (1,47) = 0.3096, p = 0.5806<br>Treatment: F (1,47) = 0.0005, p = 0.9828<br>Stress × Virus: F (1,47) = 4.5460, p = 0.0383    | Bonferroni's <i>post hoc</i> test<br><br>Control + Vehicle versus CSDS + Vehicle, p = 0.1404<br>Control + PDGF-BB versus CSDS + PDGF-BB, p = 0.5163<br>Control + Vehicle versus Control + PDGF-BB, p = 0.2888<br>CSDS + Vehicle versus CSDS + PDGF-BB, p = 0.2639 | <b>Mean ± s.e.m.</b><br><br>Control + Vehicle 54.43 ± 5.93<br>Control + PDGF-BB 46.28 ± 3.42<br>CSDS + Vehicle 44.25 ± 2.00<br>CSDS + PDGF-BB 52.24 ± 2.92 |
| <b>4C:</b> Behavioral test of SIT<br><br>LV-shGFP (n = 15)<br>LV-shPDGF-BB (n = 15)                                                                     | Unpaired <i>t</i> test<br><br>t = 2.8890, p = 0.0074                                                                                                       |                                                                                                                                                                                                                                                                   | <b>Mean ± s.e.m.</b><br><br>LV-shGFP 1.285 ± 0.167<br>LV-shPDGF-BB 0.674 ± 0.130                                                                           |

|                                                                                                                                                                                                         |                                                                                                                                                                             |                                                                                                                                                                                                                                                                                                                                                           |                                                                                                                                                                                                                |
|---------------------------------------------------------------------------------------------------------------------------------------------------------------------------------------------------------|-----------------------------------------------------------------------------------------------------------------------------------------------------------------------------|-----------------------------------------------------------------------------------------------------------------------------------------------------------------------------------------------------------------------------------------------------------------------------------------------------------------------------------------------------------|----------------------------------------------------------------------------------------------------------------------------------------------------------------------------------------------------------------|
| <p><b>4D:</b> Behavioral test of TST</p> <p>LV-shGFP (n = 15)<br/>LV-shPDGF-BB (n = 15)</p>                                                                                                             | <p>Unpaired <i>t</i> test</p> <p>t = 2.7370, p = 0.0106</p>                                                                                                                 |                                                                                                                                                                                                                                                                                                                                                           | <p><b>Mean ± s.e.m.</b></p> <p>LV-shGFP 132.2 ± 9.2<br/>LV-shPDGF-BB 168.5 ± 9.5</p>                                                                                                                           |
| <p><b>4E:</b> Behavioral test of FST</p> <p>LV-shGFP (n = 15)<br/>LV-shPDGF-BB (n = 15)</p>                                                                                                             | <p>Unpaired <i>t</i> test</p> <p>t = 3.0710, p = 0.0047</p>                                                                                                                 |                                                                                                                                                                                                                                                                                                                                                           | <p><b>Mean ± s.e.m.</b></p> <p>LV-shGFP 112.0 ± 9.2<br/>LV-shPDGF-BB 147.9 ± 7.3</p>                                                                                                                           |
| <p><b>4F:</b> Behavioral test of OFT</p> <p>LV-shGFP (n = 15)<br/>LV-shPDGF-BB (n = 15)</p>                                                                                                             | <p>Unpaired <i>t</i> test</p> <p>t = 0.1401, p = 0.8896</p>                                                                                                                 |                                                                                                                                                                                                                                                                                                                                                           | <p><b>Mean ± s.e.m.</b></p> <p>LV-shGFP 21.24 ± 2.05<br/>LV-shPDGF-BB 21.62 ± 1.75</p>                                                                                                                         |
| <p><b>4H:</b> Behavioral test of SIT</p> <p>CSDS + Vehicle + Anti-IgG (n = 14)<br/>CSDS + Vehicle + Anti-PDGF-BB (n = 15)<br/>CSDS + CNO + Anti-IgG (n = 16)<br/>CSDS + CNO + Anti-PDGF-BB (n = 16)</p> | <p>Two-way ANOVA</p> <p>Treatment: F (1,57) = 0.9231, p = 0.3407<br/>Treatment: F (1,57) = 15.6200, p = 0.0002<br/>Treatment × Treatment: F (1,57) = 6.3810, p = 0.0143</p> | <p>Bonferroni's <i>post hoc</i> test</p> <p>CSDS + Vehicle + Anti-IgG versus CSDS + CNO + Anti-IgG, p &lt; 0.001<br/>CSDS + Vehicle + Anti-PDGF-BB versus CSDS + CNO + Anti-PDGF-BB, p = 0.6263<br/>CSDS + Vehicle + Anti-IgG versus CSDS + Vehicle + Anti-PDGF-BB, p = 0.5692<br/>CSDS + CNO + Anti-IgG versus CSDS + CNO + Anti-PDGF-BB, p = 0.0284</p> | <p><b>Mean ± s.e.m.</b></p> <p>CSDS + Vehicle + Anti-IgG 0.292 ± 0.080<br/>CSDS + Vehicle + Anti-PDGF-BB 0.418 ± 0.091<br/>CSDS + CNO + Anti-IgG 0.814 ± 0.076<br/>CSDS + CNO + Anti-PDGF-BB 0.533 ± 0.076</p> |
| <p><b>4I:</b> Behavioral test of TST</p>                                                                                                                                                                | <p>Two-way ANOVA</p>                                                                                                                                                        | <p>Bonferroni's <i>post hoc</i> test</p>                                                                                                                                                                                                                                                                                                                  | <p><b>Mean ± s.e.m.</b></p>                                                                                                                                                                                    |

|                                                                                                                                                                                                                  |                                                                                                                                                                                  |                                                                                                                                                                                                                                                                                                                                                                        |                                                                                                                                                                                                                  |
|------------------------------------------------------------------------------------------------------------------------------------------------------------------------------------------------------------------|----------------------------------------------------------------------------------------------------------------------------------------------------------------------------------|------------------------------------------------------------------------------------------------------------------------------------------------------------------------------------------------------------------------------------------------------------------------------------------------------------------------------------------------------------------------|------------------------------------------------------------------------------------------------------------------------------------------------------------------------------------------------------------------|
| <p>CSDS + Vehicle + Anti-IgG (n = 14)</p> <p>CSDS + Vehicle + Anti-PDGF-BB (n = 15)</p> <p>CSDS + CNO + Anti-IgG (n = 17)</p> <p>CSDS + CNO + Anti-PDGF-BB (n = 16)</p>                                          | <p>Treatment: F (1,58) = 8.8430, p = 0.0043</p> <p>Treatment: F (1,58) = 8.800, p = 0.0044</p> <p>Treatment × Treatment: F (1,58) = 4.3430, p = 0.0416</p>                       | <p>CSDS + Vehicle + Anti-IgG versus CSDS + CNO + Anti-IgG, p = 0.0015</p> <p>CSDS + Vehicle + Anti-PDGF-BB versus CSDS + CNO + Anti-PDGF-BB, p &gt; 0.9999</p> <p>CSDS + Vehicle + Anti-IgG versus CSDS + Vehicle + Anti-PDGF-BB, p &gt; 0.9999</p> <p>CSDS + CNO + Anti-IgG versus CSDS + CNO + Anti-PDGF-BB, p = 0.0010</p>                                          | <p>CSDS + Vehicle + Anti-IgG 165.5 ± 7.2</p> <p>CSDS + Vehicle + Anti-PDGF-BB 173.3 ± 10.6</p> <p>CSDS + CNO + Anti-IgG 121.4 ± 9.1</p> <p>CSDS + CNO + Anti-PDGF-BB 165.6 ± 7.2</p>                             |
| <p><b>4J:</b> Behavioral test of FST</p> <p>CSDS + Vehicle + Anti-IgG (n = 14)</p> <p>CSDS + Vehicle + Anti-PDGF-BB (n = 15)</p> <p>CSDS + CNO + Anti-IgG (n = 17)</p> <p>CSDS + CNO + Anti-PDGF-BB (n = 16)</p> | <p>Two-way ANOVA</p> <p>Treatment: F (1,58) = 4.2380, p = 0.0440</p> <p>Treatment: F (1,58) = 1.5830, p = 0.2134</p> <p>Treatment × Treatment: F (1,58) = 4.0880, p = 0.0478</p> | <p>Bonferroni's <i>post hoc</i> test</p> <p>CSDS + Vehicle + Anti-IgG versus CSDS + CNO + Anti-IgG, p = 0.0484</p> <p>CSDS + Vehicle + Anti-PDGF-BB versus CSDS + CNO + Anti-PDGF-BB, p &gt; 0.9999</p> <p>CSDS + Vehicle + Anti-IgG versus CSDS + Vehicle + Anti-PDGF-BB, p &gt; 0.9999</p> <p>CSDS + CNO + Anti-IgG versus CSDS + CNO + Anti-PDGF-BB, p = 0.0083</p> | <p><b>Mean ± s.e.m.</b></p> <p>CSDS + Vehicle + Anti-IgG 134.0 ± 8.5</p> <p>CSDS + Vehicle + Anti-PDGF-BB 134.3 ± 10.9</p> <p>CSDS + CNO + Anti-IgG 104.3 ± 8.5</p> <p>CSDS + CNO + Anti-PDGF-BB 141.3 ± 8.1</p> |
| <p><b>4K:</b> Behavioral test of OFT</p> <p>CSDS + Vehicle + Anti-IgG (n = 14)</p> <p>CSDS + Vehicle + Anti-PDGF-BB (n = 15)</p>                                                                                 | <p>Two-way ANOVA</p> <p>Treatment: F (1,59) = 0.0007, p = 0.9785</p> <p>Treatment: F (1,59) = 0.02334, p = 0.8791</p>                                                            | <p>Bonferroni's <i>post hoc</i> test</p> <p>CSDS + Vehicle + Anti-IgG versus CSDS + CNO + Anti-IgG, p &gt; 0.9999</p>                                                                                                                                                                                                                                                  | <p><b>Mean ± s.e.m.</b></p> <p>CSDS + Vehicle + Anti-IgG 30.65 ± 3.05</p>                                                                                                                                        |

|                                                                                                                                                                                                  |                                                                                                                                                                  |                                                                                                                                                                                                                                                                                          |                                                                                                                                                                                 |
|--------------------------------------------------------------------------------------------------------------------------------------------------------------------------------------------------|------------------------------------------------------------------------------------------------------------------------------------------------------------------|------------------------------------------------------------------------------------------------------------------------------------------------------------------------------------------------------------------------------------------------------------------------------------------|---------------------------------------------------------------------------------------------------------------------------------------------------------------------------------|
| <p>CSDS + CNO + Anti-IgG (n = 17)<br/>CSDS + CNO + Anti-PDGF-BB (n = 17)</p>                                                                                                                     | <p>Treatment × Treatment: F (1,59) = 0.0274, p = 0.8691</p>                                                                                                      | <p>CSDS + Vehicle + Anti-PDGF-BB versus CSDS + CNO + Anti-PDGF-BB, p &gt; 0.9999<br/>CSDS + Vehicle + Anti-IgG versus CSDS + Vehicle + Anti-PDGF-BB, p &gt; 0.9999<br/>CSDS + CNO + Anti-IgG versus CSDS + CNO + Anti-PDGF-BB, p &gt; 0.9999</p>                                         | <p>CSDS + Vehicle + Anti-PDGF-BB 31.20 ± 2.43<br/>CSDS + CNO + Anti-IgG 30.69 ± 2.66<br/>CSDS + CNO + Anti-PDGF-BB 30.30 ± 3.08</p>                                             |
| <p><b>5C:</b> Quantification of the number of BrdU positive cells</p> <p>Control + LV-GFP (n=4)<br/>Control + LV-PDGF-BB (n = 4)<br/>CSDS + LV-GFP (n = 4)<br/>CSDS + LV-PDGF-BB (n = 4)</p>     | <p>Two-way ANOVA</p> <p>Stress: F (1,12) = 7.9930, p = 0.0153<br/>Virus: F (1,12) = 61.5700, p &lt; 0.001<br/>Stress × Virus: F (1,12) = 10.6900, p = 0.0067</p> | <p>Bonferroni's <i>post hoc</i> test</p> <p>Control + LV-GFP versus CSDS + LV-GFP, p = 0.0020<br/>Control + LV-PDGF-BB versus CSDS + LV-PDGF-BB, p &gt; 0.9999<br/>Control + LV-GFP versus Control + LV-PDGF-BB, p = 0.0143<br/>CSDS + LV-GFP versus CSDS + LV-PDGF-BB, p &lt; 0.001</p> | <p><b>Mean ± s.e.m.</b></p> <p>Control + LV-GFP 2238.0 ± 164.8<br/>Control + LV-PDGF-BB 2833.0 ± 152.1<br/>CSDS + LV-GFP 1445.0 ± 60.1<br/>CSDS + LV-PDGF-BB 2890.0 ± 116.9</p> |
| <p><b>5D:</b> Quantification of the number of BrdU/DCX positive cells</p> <p>Control + LV-GFP (n=4)<br/>Control + LV-PDGF-BB (n = 4)<br/>CSDS + LV-GFP (n = 4)<br/>CSDS + LV-PDGF-BB (n = 4)</p> | <p>Two-way ANOVA</p> <p>Stress: F (1,12) = 9.4360, p = 0.0097<br/>Virus: F (1,12) = 25.2700, p = 0.0003<br/>Stress × Virus: F (1,12) = 5.5250, p = 0.0367</p>    | <p>Bonferroni's <i>post hoc</i> test</p> <p>Control + LV-GFP versus CSDS + LV-GFP, p = 0.0048<br/>Control + LV-PDGF-BB versus CSDS + LV-PDGF-BB, p &gt; 0.9999<br/>Control + LV-GFP versus Control + LV-PDGF-BB, p = 0.1656</p>                                                          | <p><b>Mean ± s.e.m.</b></p> <p>Control + LV-GFP 1380.0 ± 117.3<br/>Control + LV-PDGF-BB 1668.0 ± 95.5<br/>CSDS + LV-GFP 797.5 ± 94.2<br/>CSDS + LV-PDGF-BB 1590.0 ± 120.1</p>   |

|                                                                                                                                                                                                       |                                                                                                                                                                |                                                                                                                                                                                                                                                                                        |                                                                                                                                                                                  |
|-------------------------------------------------------------------------------------------------------------------------------------------------------------------------------------------------------|----------------------------------------------------------------------------------------------------------------------------------------------------------------|----------------------------------------------------------------------------------------------------------------------------------------------------------------------------------------------------------------------------------------------------------------------------------------|----------------------------------------------------------------------------------------------------------------------------------------------------------------------------------|
|                                                                                                                                                                                                       |                                                                                                                                                                | CSDS + LV-GFP versus CSDS + LV-PDGF-BB, p = 0.0004                                                                                                                                                                                                                                     |                                                                                                                                                                                  |
| <p><b>5F:</b> Quantification of the number of BrdU/Sox2/GFAP positive NSCs</p> <p>Control + LV-GFP (n=4)<br/>Control + LV-PDGF-BB (n = 4)<br/>CSDS + LV-GFP (n = 4)<br/>CSDS + LV-PDGF-BB (n = 4)</p> | <p>Two-way ANOVA</p> <p>Stress: F (1,12) = 15.9500, p = 0.0018<br/>Virus: F (1,12) = 22.7200, p = 0.0005<br/>Stress × Virus: F (1,12) = 3.2040, p = 0.0987</p> | <p>Bonferroni's <i>post hoc</i> test</p> <p>Control + LV-GFP versus CSDS + LV-GFP, p = 0.0030<br/>Control + LV-PDGF-BB versus CSDS + LV-PDGF-BB, p = 0.2904<br/>Control + LV-GFP versus Control + LV-PDGF-BB, p = 0.1141<br/>CSDS + LV-GFP versus CSDS + LV-PDGF-BB, p = 0.0011</p>    | <p><b>Mean ± s.e.m.</b></p> <p>Control + LV-GFP 557.5 ± 86.4<br/>Control + LV-PDGF-BB 737.5 ± 19.3<br/>CSDS + LV-GFP 207.8 ± 32.0<br/>CSDS + LV-PDGF-BB 604.3 ± 76.0</p>         |
| <p><b>5G:</b> Quantification of the number of Sox2/GFAP positive NSCs</p> <p>Control + LV-GFP (n=4)<br/>Control + LV-PDGF-BB (n = 4)<br/>CSDS + LV-GFP (n = 4)<br/>CSDS + LV-PDGF-BB (n = 4)</p>      | <p>Two-way ANOVA</p> <p>Stress: F (1,12) = 0.8694, p = 0.3695<br/>Virus: F (1,12) = 5.8640, p = 0.0322<br/>Stress × Virus: F (1,12) = 0.08552, p = 0.7749</p>  | <p>Bonferroni's <i>post hoc</i> test</p> <p>Control + LV-GFP versus CSDS + LV-GFP, p &gt; 0.9999<br/>Control + LV-PDGF-BB versus CSDS + LV-PDGF-BB, p = 0.8068<br/>Control + LV-GFP versus Control + LV-PDGF-BB, p = 0.3161<br/>CSDS + LV-GFP versus CSDS + LV-PDGF-BB, p = 0.1581</p> | <p><b>Mean ± s.e.m.</b></p> <p>Control + LV-GFP 7825.0 ± 195.9<br/>Control + LV-PDGF-BB 8250.0 ± 108.6<br/>CSDS + LV-GFP 7953.0 ± 201.9<br/>CSDS + LV-PDGF-BB 8495.0 ± 261.6</p> |
| <p><b>5H:</b> The ratio of aNSCs to qNSCs</p> <p>Control + LV-GFP (n=4)<br/>Control + LV-PDGF-BB (n = 4)</p>                                                                                          | <p>Two-way ANOVA</p> <p>Stress: F (1,12) = 23.1900, p = 0.0004</p>                                                                                             | <p>Bonferroni's <i>post hoc</i> test</p> <p>Control + LV-GFP versus CSDS + LV-GFP, p = 0.0009</p>                                                                                                                                                                                      | <p><b>Mean ± s.e.m.</b></p> <p>Control + LV-GFP 1.00 ± 0.15</p>                                                                                                                  |



|                                                                                                                                                                                                   |                                                                                                                                                                                                                             |                                                                                                                                                                                                                                                                                                                                                                     |                                                                                                                                                                                                                                                                 |
|---------------------------------------------------------------------------------------------------------------------------------------------------------------------------------------------------|-----------------------------------------------------------------------------------------------------------------------------------------------------------------------------------------------------------------------------|---------------------------------------------------------------------------------------------------------------------------------------------------------------------------------------------------------------------------------------------------------------------------------------------------------------------------------------------------------------------|-----------------------------------------------------------------------------------------------------------------------------------------------------------------------------------------------------------------------------------------------------------------|
| <p>CSDS + LV-GFP (n = 4)<br/>CSDS + LV-PDGF-BB (n = 4)</p>                                                                                                                                        | <p>Virus: <math>F(1,12) = 22.7700, p = 0.0005</math><br/>Stress <math>\times</math> Virus: <math>F(1,12) = 3.8660, p = 0.0728</math></p>                                                                                    | <p>Control + LV-PDGF-BB versus CSDS + LV-PDGF-BB, <math>p = 0.1337</math><br/>Control + LV-GFP versus Control + LV-PDGF-BB, <math>p = 0.1413</math><br/>CSDS + LV-GFP versus CSDS + LV-PDGF-BB, <math>p = 0.0009</math></p>                                                                                                                                         | <p>Control + LV-PDGF-BB <math>1.26 \pm 0.02</math><br/>CSDS + LV-GFP <math>0.37 \pm 0.06</math><br/>CSDS + LV-PDGF-BB <math>0.99 \pm 0.10</math></p>                                                                                                            |
| <p><b>5K:</b> Quantification of branch number</p> <p>Control + AAV-mCherry (n = 26)<br/>Control + AAV-PDGF-BB (n = 25)<br/>CSDS + AAV-mCherry (n = 27)<br/>CSDS + AAV-PDGF-BB (n = 25)</p>        | <p>Two-way ANOVA</p> <p>Stress: <math>F(1,99) = 18.0900, p &lt; 0.001</math><br/>Virus: <math>F(1,99) = 18.9300, p &lt; 0.001</math><br/>Stress <math>\times</math> Virus: <math>F(1,99) = 34.2900, p &lt; 0.001</math></p> | <p>Bonferroni's <i>post hoc</i> test</p> <p>Control + AAV-mCherry versus CSDS + AAV-mCherry, <math>p &lt; 0.001</math><br/>Control + AAV-PDGF-BB versus CSDS + AAV-PDGF-BB, <math>p = 0.5330</math><br/>Control + AAV-mCherry versus Control + AAV-PDGF-BB, <math>p = 0.5838</math><br/>CSDS + AAV-mCherry versus CSDS + AAV-PDGF-BB, <math>p &lt; 0.001</math></p> | <p><b>Mean <math>\pm</math> s.e.m.</b></p> <p>Control + AAV-mCherry <math>5.7 \pm 0.3</math><br/>Control + AAV-PDGF-BB <math>5.3 \pm 0.4</math><br/>CSDS + AAV-mCherry <math>2.7 \pm 0.2</math><br/>CSDS + AAV-PDGF-BB <math>5.8 \pm 0.3</math></p>             |
| <p><b>5L:</b> Quantification of the dendritic length</p> <p>Control + AAV-mCherry (n = 26)<br/>Control + AAV-PDGF-BB (n = 25)<br/>CSDS + AAV-mCherry (n = 27)<br/>CSDS + AAV-PDGF-BB (n = 25)</p> | <p>Two-way ANOVA</p> <p>Stress: <math>F(1,99) = 10.4200, p = 0.0017</math><br/>Virus: <math>F(1,99) = 10.2100, p = 0.0019</math><br/>Stress <math>\times</math> Virus: <math>F(1,99) = 32.1500, p &lt; 0.001</math></p>     | <p>Bonferroni's <i>post hoc</i> test</p> <p>Control + AAV-mCherry versus CSDS + AAV-mCherry, <math>p &lt; 0.001</math><br/>Control + AAV-PDGF-BB versus CSDS + AAV-PDGF-BB, <math>p = 0.1837</math><br/>Control + AAV-mCherry versus Control + AAV-PDGF-BB, <math>p = 0.1694</math><br/>CSDS + AAV-mCherry versus CSDS + AAV-PDGF-BB, <math>p &lt; 0.001</math></p> | <p><b>Mean <math>\pm</math> s.e.m.</b></p> <p>Control + AAV-mCherry <math>703.6 \pm 32.4</math><br/>Control + AAV-PDGF-BB <math>618.2 \pm 39.1</math><br/>CSDS + AAV-mCherry <math>396.3 \pm 28.8</math><br/>CSDS + AAV-PDGF-BB <math>702.5 \pm 37.8</math></p> |
| <p><b>6C:</b> Quantification of the</p>                                                                                                                                                           | <p>Unpaired <i>t</i> test</p>                                                                                                                                                                                               |                                                                                                                                                                                                                                                                                                                                                                     | <p><b>Mean <math>\pm</math> s.e.m.</b></p>                                                                                                                                                                                                                      |

|                                                                                                                         |                                                      |  |                                                                                          |
|-------------------------------------------------------------------------------------------------------------------------|------------------------------------------------------|--|------------------------------------------------------------------------------------------|
| number of BrdU positive cells<br><br>LV-shGFP (n = 4)<br>LV-shPDGF-BB (n = 4)                                           | <br><br>t = 2.5100, p = 0.0459                       |  | <br><br>LV-shGFP<br>2102.0 ± 197.0<br>LV-shPDGF-BB<br>1364.0 ± 218.3                     |
| <b>6D:</b> Quantification of the number of BrdU/DCX<br><br>LV-shGFP (n = 4)<br>LV-shPDGF-BB (n = 4)                     | Unpaired <i>t</i> test<br><br>t = 2.7740, p = 0.0322 |  | <b>Mean ± s.e.m.</b><br><br>LV-shGFP<br>1036.0 ± 127.8<br>LV-shPDGF-BB<br>580.0 ± 103.2  |
| <b>6F:</b> Quantification of the number of BrdU/Sox2/GFAP positive NSCs<br><br>LV-shGFP (n = 4)<br>LV-shPDGF-BB (n = 4) | Unpaired <i>t</i> test<br><br>t = 3.5650, p = 0.0119 |  | <b>Mean ± s.e.m.</b><br><br>LV-shGFP<br>362.5 ± 23.9<br>LV-shPDGF-BB<br>173.0 ± 47.5     |
| <b>6G:</b> Quantification of the number of Sox2/GFAP positive NSCs<br><br>LV-shGFP (n = 4)<br>LV-shPDGF-BB (n = 4)      | Unpaired <i>t</i> test<br><br>t = 0.2787, p = 0.7898 |  | <b>Mean ± s.e.m.</b><br><br>LV-shGFP<br>6515.0 ± 120.7<br>LV-shPDGF-BB<br>6384.0 ± 454.2 |
| <b>6H:</b> The ratio of aNSCs to qNSCs<br><br>LV-shGFP (n = 4)<br>LV-shPDGF-BB (n = 4)                                  | Unpaired <i>t</i> test<br><br>t = 3.5560, p = 0.0120 |  | <b>Mean ± s.e.m.</b><br><br>LV-shGFP<br>1.00 ± 0.08<br>LV-shPDGF-BB<br>0.49 ± 0.12       |
| <b>6K:</b> Quantification of branch number<br><br>LV-shmCherry (n = 25 neurons)                                         | Unpaired <i>t</i> test<br><br>t = 6.0250, p < 0.001  |  | <b>Mean ± s.e.m.</b><br><br>LV-shCherry<br>6.4 ± 0.4<br>LV-shPDGF-BB                     |

|                                                                                                                         |                                                      |                                   |                                                                                                |
|-------------------------------------------------------------------------------------------------------------------------|------------------------------------------------------|-----------------------------------|------------------------------------------------------------------------------------------------|
| LV-shPDGF-BB (n = 25 neurons)                                                                                           |                                                      |                                   | 3.3 ± 0.3                                                                                      |
| <b>6L:</b> Quantification of the dendritic length<br><br>LV-shmCherry (n = 25 neurons)<br>LV-shPDGF-BB (n = 25 neurons) | Unpaired <i>t</i> test<br><br>t = 6.0040, p < 0.001  |                                   | <b>Mean ± s.e.m.</b><br><br>LV-shCherry<br>813.5 ± 40.6<br>LV-shPDGF-BB<br>477.9 ± 38.5        |
| <b>7C:</b> Behavioral tests of SIT<br><br>AAV-DIO-shGFP (n = 15)<br>AAV-DIO-shPDGFRβ (n = 12)                           | Unpaired <i>t</i> test<br><br>t = 2.8320, p = 0.0090 |                                   | <b>Mean ± s.e.m.</b><br><br>AAV-DIO-shGFP<br>1.247 ± 0.139<br>AAV-DIO-shPDGFβ<br>0.517 ± 0.230 |
| <b>7D:</b> Behavioral tests of TST<br><br>AAV-DIO-shGFP (n = 15)<br>AAV-DIO-shPDGFRβ (n=12)                             | Unpaired <i>t</i> test<br><br>t = 2.0690, p = 0.0490 |                                   | <b>Mean ± s.e.m.</b><br><br>AAV-DIO-shGFP<br>137.9 ± 11.5<br>AAV-DIO-shPDGFβ<br>170.2 ± 9.9    |
| <b>7E:</b> Behavioral tests of FST<br><br>AAV-DIO-shGFP (n = 15)<br>AAV-DIO-shPDGFRβ (n = 12)                           | Unpaired <i>t</i> test<br><br>t = 2.2650, p = 0.0324 |                                   | <b>Mean ± s.e.m.</b><br><br>AAV-DIO-shGFP<br>96.0 ± 11.3<br>AAV-DIO-shPDGFβ<br>132.2 ± 10.9    |
| <b>7F:</b> Behavioral tests of OFT<br><br>AAV-DIO-shGFP (n = 15)<br>AAV-DIO-shPDGFRβ (n = 12)                           | Unpaired <i>t</i> test<br><br>t = 0.1951, p = 0.8469 |                                   | <b>Mean ± s.e.m.</b><br><br>AAV-DIO-GFP<br>31.28 ± 2.98<br>AAV-DIO-shPDGFβ<br>32.11 ± 2.94     |
| <b>7H:</b> Behavioral tests of FST                                                                                      | Two-way ANOVA<br><br>Treatment: F (1,47) =           | Bonferroni's <i>post hoc</i> test | <b>Mean ± s.e.m.</b>                                                                           |

|                                                                                                                                                                                                            |                                                                                                                                                                   |                                                                                                                                                                                                                                                                                                                                                                       |                                                                                                                                                                                                                                             |
|------------------------------------------------------------------------------------------------------------------------------------------------------------------------------------------------------------|-------------------------------------------------------------------------------------------------------------------------------------------------------------------|-----------------------------------------------------------------------------------------------------------------------------------------------------------------------------------------------------------------------------------------------------------------------------------------------------------------------------------------------------------------------|---------------------------------------------------------------------------------------------------------------------------------------------------------------------------------------------------------------------------------------------|
| AAV-DIO-shGFP + Vehicle (n = 13)<br>AAV-DIO-shGFP + PDGF-BB (n = 14)<br>AAV-DIO-shPDGFR $\beta$ + Vehicle (n = 12)<br>AAV-DIO-shPDGFR $\beta$ + PDGF-BB (n = 12)                                           | 0.4228, p = 0.5187<br>Virus: F (1,47) = 14.8400, p = 0.0004<br>Treatment $\times$ Virus: F (1,47) = 7.9790, p = 0.0069                                            | AAV-DIO-shGFP + Vehicle versus AAV-DIO-shPDGFR $\beta$ + Vehicle, p = 0.9496<br>AAV-DIO-shGFP + PDGF-BB versus AAV-DIO-shPDGFR $\beta$ + PDGF-BB, p < 0.001<br>AAV-DIO-shGFP + Vehicle versus AAV-DIO-shGFP + PDGF-BB, p = 0.0295<br>AAV-DIO-shPDGFR $\beta$ + Vehicle versus AAV-DIO-shPDGFR $\beta$ + PDGF-BB, p = 0.2833                                           | AAV-DIO-shGFP + Vehicle 120.7 $\pm$ 4.8<br>AAV-DIO-shGFP + PDGF-BB 94.9 $\pm$ 8.7<br>AAV-DIO-shPDGFR $\beta$ + Vehicle 128.3 $\pm$ 5.9<br>AAV-DIO-shPDGFR $\beta$ + PDGF-BB 144.5 $\pm$ 9.2                                                 |
| <b>7I:</b> Behavioral tests of OFT<br><br>AAV-DIO-shGFP + Vehicle (n = 13)<br>AAV-DIO-shGFP + PDGF-BB (n = 14)<br>AAV-DIO-shPDGFR $\beta$ + Vehicle (n = 12)<br>AAV-DIO-shPDGFR $\beta$ + PDGF-BB (n = 12) | Two-way ANOVA<br><br>Treatment: F (1,47) = 0.4061, p = 0.5271<br>Virus: F (1,47) = 2.8470, p = 0.0982<br>Treatment $\times$ Virus: F (1,47) = 0.04302, p = 0.8366 | Bonferroni's <i>post hoc</i> test<br><br>AAV-DIO-shGFP + Vehicle versus AAV-DIO-shPDGFR $\beta$ + Vehicle, p = 0.3810<br>AAV-DIO-shGFP + PDGF-BB versus AAV-DIO-shPDGFR $\beta$ + PDGF-BB, p = 0.5929<br>AAV-DIO-shGFP + Vehicle versus AAV-DIO-shGFP + PDGF-BB, p > 0.9999<br>AAV-DIO-shPDGFR $\beta$ + Vehicle versus AAV-DIO-shPDGFR $\beta$ + PDGF-BB, p > 0.9999 | <b>Mean <math>\pm</math> s.e.m.</b><br><br>AAV-DIO-shGFP + Vehicle 42.34 $\pm$ 2.50<br>AAV-DIO-shGFP + PDGF-BB 40.02 $\pm$ 3.30<br>AAV-DIO-shPDGFR $\beta$ + Vehicle 37.14 $\pm$ 2.53<br>AAV-DIO-shPDGFR $\beta$ + PDGF-BB 35.96 $\pm$ 2.31 |
| <b>7K:</b> Quantification of the number of BrdU positive cells                                                                                                                                             | Two-way ANOVA                                                                                                                                                     | Bonferroni's <i>post hoc</i> test                                                                                                                                                                                                                                                                                                                                     | <b>Mean <math>\pm</math> s.e.m.</b>                                                                                                                                                                                                         |

|                                                                                                                                                              |                                                                                                                                              |                                                                                                                                                                                                                                                                                                                              |                                                                                                                                                                                                         |
|--------------------------------------------------------------------------------------------------------------------------------------------------------------|----------------------------------------------------------------------------------------------------------------------------------------------|------------------------------------------------------------------------------------------------------------------------------------------------------------------------------------------------------------------------------------------------------------------------------------------------------------------------------|---------------------------------------------------------------------------------------------------------------------------------------------------------------------------------------------------------|
| AAV-DIO-shGFP + Vehicle (n = 3)<br>AAV-DIO-shGFP + PDGF-BB (n = 4)<br>AAV-DIO-shPDGFR $\beta$ + Vehicle (n = 3)<br>AAV-DIO-shPDGFR $\beta$ + PDGF-BB (n = 4) | Treatment: F (1,10) = 0.3994, p = 0.5416<br>Virus: F (1,10) = 5.8770, p = 0.0358<br>Treatment $\times$ Virus: F (1,10) = 15.8800, p = 0.0026 | AAV-DIO-shGFP + Vehicle versus AAV-DIO-shPDGFR $\beta$ + Vehicle, p = 0.6523<br>AAV-DIO-shGFP + PDGF-BB versus AAV-DIO-shPDGFR $\beta$ + PDGF-BB, p = 0.0013<br>AAV-DIO-shGFP + Vehicle versus AAV-DIO-shGFP + PDGF-BB, p = 0.0170<br>AAV-DIO-shPDGFR $\beta$ + Vehicle versus AAV-DIO-shPDGFR $\beta$ + PDGF-BB, p = 0.0784 | AAV-DIO-shGFP + Vehicle 1827.0 $\pm$ 68.9<br>AAV-DIO-shGFP + PDGF-BB 3448.0 $\pm$ 541.0<br>AAV-DIO-shPDGFR $\beta$ + Vehicle 2375.0 $\pm$ 101.8<br>AAV-DIO-shPDGFR $\beta$ + PDGF-BB 1198.0 $\pm$ 227.7 |
| <b>7L:</b> Quantification of the number of BrdU/Sox2/GFAP positive NSCs                                                                                      | Two-way ANOVA                                                                                                                                | Bonferroni's <i>post hoc</i> test                                                                                                                                                                                                                                                                                            | <b>Mean <math>\pm</math> s.e.m.</b>                                                                                                                                                                     |
| AAV-DIO-shGFP + Vehicle (n = 3)<br>AAV-DIO-shGFP + PDGF-BB (n = 4)<br>AAV-DIO-shPDGFR $\beta$ + Vehicle (n = 3)<br>AAV-DIO-shPDGFR $\beta$ + PDGF-BB (n = 4) | Treatment: F (1,10) = 1.0040, p = 0.3400<br>Virus: F (1,10) = 4.9730, p = 0.0498<br>Treatment $\times$ Virus: F (1,10) = 7.8620, p = 0.0187  | AAV-DIO-shGFP + Vehicle versus AAV-DIO-shPDGFR $\beta$ + Vehicle, p > 0.9999<br>AAV-DIO-shGFP + PDGF-BB versus AAV-DIO-shPDGFR $\beta$ + PDGF-BB, p = 0.0065<br>AAV-DIO-shGFP + Vehicle versus AAV-DIO-shGFP + PDGF-BB, p = 0.0453<br>AAV-DIO-shPDGFR $\beta$ + Vehicle versus AAV-DIO-shPDGFR $\beta$ + PDGF-BB, p = 0.4629 | AAV-DIO-shGFP + Vehicle 256.7 $\pm$ 32.83<br>AAV-DIO-shGFP + PDGF-BB 533.0 $\pm$ 92.3<br>AAV-DIO-shPDGFR $\beta$ + Vehicle 298.3 $\pm$ 83.7<br>AAV-DIO-shPDGFR $\beta$ + PDGF-BB 167.5 $\pm$ 50.1       |
| <b>7M:</b> Quantification of the number of Sox2/GFAP positive NSCs                                                                                           | Two-way ANOVA                                                                                                                                | Bonferroni's <i>post hoc</i> test                                                                                                                                                                                                                                                                                            | <b>Mean <math>\pm</math> s.e.m.</b>                                                                                                                                                                     |

|                                                                                                                                                                                                                                                   |                                                                                                                                                                                            |                                                                                                                                                                                                                                                                                                                                                                                                                                  |                                                                                                                                                                                                                                                                                                                            |
|---------------------------------------------------------------------------------------------------------------------------------------------------------------------------------------------------------------------------------------------------|--------------------------------------------------------------------------------------------------------------------------------------------------------------------------------------------|----------------------------------------------------------------------------------------------------------------------------------------------------------------------------------------------------------------------------------------------------------------------------------------------------------------------------------------------------------------------------------------------------------------------------------|----------------------------------------------------------------------------------------------------------------------------------------------------------------------------------------------------------------------------------------------------------------------------------------------------------------------------|
| <p>AAV-DIO-shGFP + Vehicle (n = 3)</p> <p>AAV-DIO-shGFP + PDGF-BB (n = 4)</p> <p>AAV-DIO-shPDGFR<math>\beta</math> + Vehicle (n = 3)</p> <p>AAV-DIO-shPDGFR<math>\beta</math> + PDGF-BB (n = 4)</p>                                               | <p>Treatment: F (1,10) = 1.5410, p = 0.2428</p> <p>Virus: F (1,10) = 1.2820, p = 0.2839</p> <p>Treatment <math>\times</math> Virus: F (1,10) = 1.5900, p = 0.2359</p>                      | <p>AAV-DIO-shGFP + Vehicle versus AAV-DIO-shPDGFR<math>\beta</math> + Vehicle, p = 0.2145</p> <p>AAV-DIO-shGFP + PDGF-BB versus AAV-DIO-shPDGFR<math>\beta</math> + PDGF-BB, p &gt; 0.9999</p> <p>AAV-DIO-shGFP + Vehicle versus AAV-DIO-shGFP + PDGF-BB, p = 0.2890</p> <p>AAV-DIO-shPDGFR<math>\beta</math> + Vehicle versus AAV-DIO-shPDGFR<math>\beta</math> + PDGF-BB, p &gt; 0.9999</p>                                    | <p>AAV-DIO-shGFP + Vehicle 8067.0 <math>\pm</math> 34.8</p> <p>AAV-DIO-shGFP + PDGF-BB 6115.0 <math>\pm</math> 539.2</p> <p>AAV-DIO-shPDGFR<math>\beta</math> + Vehicle 6200.0 <math>\pm</math> 595.3</p> <p>AAV-DIO-shPDGFR<math>\beta</math> + PDGF-BB 6215.0 <math>\pm</math> 1127.0</p>                                |
| <p><b>7N:</b> The ratio of aNSCs to qNSCs</p> <p>AAV-DIO-shGFP + Vehicle (n = 3)</p> <p>AAV-DIO-shGFP + PDGF-BB (n = 4)</p> <p>AAV-DIO-shPDGFR<math>\beta</math> + Vehicle (n = 3)</p> <p>AAV-DIO-shPDGFR<math>\beta</math> + PDGF-BB (n = 4)</p> | <p>Two-way ANOVA</p> <p>Treatment: F (1,10) = 1.8670, p = 0.2017</p> <p>Virus: F (1,10) = 3.5670, p = 0.0883</p> <p>Treatment <math>\times</math> Virus: F (1,10) = 8.7410, p = 0.0144</p> | <p>Bonferroni's <i>post hoc</i> test</p> <p>AAV-DIO-shGFP + Vehicle versus AAV-DIO-shPDGFR<math>\beta</math> + Vehicle, p = 0.9921</p> <p>AAV-DIO-shGFP + PDGF-BB versus AAV-DIO-shPDGFR<math>\beta</math> + PDGF-BB, p = 0.0082</p> <p>AAV-DIO-shGFP + Vehicle versus AAV-DIO-shGFP + PDGF-BB, p = 0.0242</p> <p>AAV-DIO-shPDGFR<math>\beta</math> + Vehicle versus AAV-DIO-shPDGFR<math>\beta</math> + PDGF-BB, p = 0.5742</p> | <p><b>Mean <math>\pm</math> s.e.m.</b></p> <p>AAV-DIO-shGFP + Vehicle 1.00 <math>\pm</math> 0.12</p> <p>AAV-DIO-shGFP + PDGF-BB 2.91 <math>\pm</math> 0.69</p> <p>AAV-DIO-shPDGFR<math>\beta</math> + Vehicle 1.47 <math>\pm</math> 0.31</p> <p>AAV-DIO-shPDGFR<math>\beta</math> + PDGF-BB 0.77 <math>\pm</math> 0.16</p> |
| <p><b>S2C:</b> Behavioral tests of SIT</p> <p>Control (n = 13)</p>                                                                                                                                                                                | <p>Unpaired <i>t</i> test</p> <p>t = 11.0700,</p>                                                                                                                                          |                                                                                                                                                                                                                                                                                                                                                                                                                                  | <p><b>Mean <math>\pm</math> s.e.m.</b></p>                                                                                                                                                                                                                                                                                 |

|                                                                                                                                     |                                                      |  |                                                                       |
|-------------------------------------------------------------------------------------------------------------------------------------|------------------------------------------------------|--|-----------------------------------------------------------------------|
| CSDS (n=12)                                                                                                                         | p < 0.001                                            |  | Control 1.884 ± 0.104<br>CSDS 0.502 ± 0.064                           |
| <b>S2D:</b> Behavioral tests of SPT<br><br>Control (n = 13)<br>CSDS (n = 12)                                                        | Unpaired <i>t</i> test<br><br>t = 6.2040, p < 0.001  |  | <b>Mean ± s.e.m.</b><br><br>Control 87.97 ± 1.58<br>CSDS 52.40 ± 5.73 |
| <b>S3B:</b> Behavioral effects of the chemogenetic inhibition of MS-DG neurons in the TST<br><br>Vehicle (n = 14)<br>CNO (n = 17)   | Unpaired <i>t</i> test<br><br>t = 2.7080, p=0.0112   |  | <b>Mean ± s.e.m.</b><br><br>Vehicle 137.4 ± 7.6<br>CNO 102.5 ± 9.9    |
| <b>S3C:</b> Behavioral effects of the chemogenetic inhibition of MS-DG neurons in the FST<br><br>Vehicle (n = 14)<br>CNO (n = 17)   | Unpaired <i>t</i> test<br><br>t = 2.0960, p = 0.0449 |  | <b>Mean ± s.e.m.</b><br><br>Vehicle 131.1 ± 8.2<br>CNO 106.6 ± 8.2    |
| <b>S3D:</b> Behavioral effects of the chemogenetic inhibition of MS-DG neurons in the OFT<br><br>Vehicle (n = 14)<br>CNO (n = 17)   | Unpaired <i>t</i> test<br><br>t = 0.4048, p = 0.6886 |  | <b>Mean ± s.e.m.</b><br><br>Vehicle 38.69 ± 2.23<br>CNO 39.89 ± 1.96  |
| <b>S4B:</b> Patch clamp recording from neurons expressing hM4Di-mCherry in the MS<br><br>Control (n = 4 cells)<br>CNO (n = 4 cells) | Unpaired <i>t</i> test<br><br>t = 4.8000, p = 0.0030 |  | <b>Mean ± s.e.m.</b><br><br>Control 9.5 ± 0.6<br>CNO 4.8 ± 0.8        |
| <b>S4D:</b> Patch clamp recording from neurons expressing hM3Dq-mCherry in the MS                                                   | Two-tailed paired <i>t</i> test                      |  | <b>Mean ± s.e.m.</b>                                                  |

|                                                                                                                                  |                                                      |  |                                                                        |
|----------------------------------------------------------------------------------------------------------------------------------|------------------------------------------------------|--|------------------------------------------------------------------------|
| CNO (n = 4 cells)                                                                                                                | t = 14.8100,<br>P = 0.0007                           |  | Before-CNO<br>-63.80 ± 4.60<br>After-CNO<br>-40.50 ± 4.23              |
| <b>S5B:</b> Behavioral effects of the chemogenetic activation of MS-DG neurons in the SIT<br><br>Vehicle (n = 8)<br>CNO (n = 10) | Unpaired <i>t</i> test<br><br>t = 1.1970, p = 0.2486 |  | <b>Mean ± s.e.m.</b><br><br>Vehicle 1.251 ± 0.136<br>CNO 1.688 ± 0.306 |
| <b>S5C:</b> Behavioral effects of the chemogenetic activation of MS-DG neurons in the SPT<br><br>Vehicle (n = 8)<br>CNO (n = 11) | Unpaired <i>t</i> test<br><br>t = 0.2279, p = 0.8225 |  | <b>Mean ± s.e.m.</b><br><br>Vehicle 71.24 ± 8.09<br>CNO 73.04 ± 3.40   |
| <b>S5D:</b> Behavioral effects of the chemogenetic activation of MS-DG neurons in the TST<br><br>Vehicle (n = 8)<br>CNO (n = 11) | Unpaired <i>t</i> test<br><br>t = 1.7330, p = 0.1013 |  | <b>Mean ± s.e.m.</b><br><br>Vehicle 143.1 ± 9.5<br>CNO 112.2 ± 13.5    |
| <b>S5E:</b> Behavioral effects of the chemogenetic activation of MS-DG neurons in the FST<br><br>Vehicle (n = 8)<br>CNO (n = 11) | Unpaired <i>t</i> test<br><br>t = 0.2470, p = 0.8079 |  | <b>Mean ± s.e.m.</b><br><br>Vehicle 101.8 ± 9.0<br>CNO 106.0 ± 13.1    |
| <b>S5F:</b> Behavioral effects of the chemogenetic activation of MS-DG neurons in the OFT<br><br>Vehicle (n = 8)<br>CNO (n = 11) | Unpaired <i>t</i> test<br><br>t = 0.2452, p = 0.8093 |  | <b>Mean ± s.e.m.</b><br><br>Vehicle 21.71 ± 2.97<br>CNO 22.60 ± 2.22   |



|                                                                                                                                                                                                                    |                                                                                                                                                                       |                                                                                                                                                                                                                                                                     |                                                                                                                                                                  |
|--------------------------------------------------------------------------------------------------------------------------------------------------------------------------------------------------------------------|-----------------------------------------------------------------------------------------------------------------------------------------------------------------------|---------------------------------------------------------------------------------------------------------------------------------------------------------------------------------------------------------------------------------------------------------------------|------------------------------------------------------------------------------------------------------------------------------------------------------------------|
| <p><b>S6C:</b> PDGF-BB mRNA expression in the DG after CSDS</p> <p>Control (n = 10)<br/>CSDS (n = 13)</p>                                                                                                          | <p>Unpaired <i>t</i> test</p> <p>t = 3.0480, p = 0.0061</p>                                                                                                           |                                                                                                                                                                                                                                                                     | <p><b>Mean ± s.e.m.</b></p> <p>Control 1.000 ± 0.048<br/>CSDS 0.759 ± 0.059</p>                                                                                  |
| <p><b>S6D:</b> PDGF-BB protein levels in the DG as determined by ELISA after CSDS</p> <p>Control (n = 8)<br/>CSDS (n = 8)</p>                                                                                      | <p>Unpaired <i>t</i> test</p> <p>t = 2.6160, p = 0.0203</p>                                                                                                           |                                                                                                                                                                                                                                                                     | <p><b>Mean ± s.e.m.</b></p> <p>Control 172.2 ± 6.2<br/>CSDS 138.3 ± 11.4</p>                                                                                     |
| <p><b>S6E:</b> PDGF-BB mRNA expression in the DG after inhibition of MS-DG projection neurons</p> <p>Control + Vehicle (n = 10)<br/>Control + CNO (n = 10)<br/>CSDS + Vehicle (n = 14)<br/>CSDS + CNO (n = 16)</p> | <p>Two-way ANOVA</p> <p>Stress: F (1,46) = 5.3210, p = 0.0256<br/>Treatment: F (1,46) = 11.1600, p = 0.0017<br/>Stress × Treatment: F (1,46) = 6.5860, p = 0.0136</p> | <p>Bonferroni's <i>post hoc</i> test</p> <p>Control + Vehicle versus CSDS + Vehicle, p = 0.0028<br/>Control + CNO versus CSDS + CNO, p &gt; 0.9999<br/>Control + Vehicle versus Control + CNO, p &gt; 0.9999<br/>CSDS + Vehicle versus CSDS + CNO, p &lt; 0.001</p> | <p><b>Mean ± s.e.m.</b></p> <p>Control + Vehicle 0.961 ± 0.088<br/>Control + CNO 1.016 ± 0.064<br/>CSDS + Vehicle 0.620 ± 0.063<br/>CSDS + CNO 1.034 ± 0.062</p> |
| <p><b>S6F:</b> PDGF-BB mRNA expression in the DG after stimulation MS-DG projection neurons</p> <p>Vehicle (n = 13)<br/>CNO (n = 14)</p>                                                                           | <p>Unpaired <i>t</i> test</p> <p>t = 2.5680, p = 0.0166</p>                                                                                                           |                                                                                                                                                                                                                                                                     | <p><b>Mean ± s.e.m.</b></p> <p>Vehicle 1.000 ± 0.055<br/>CNO 0.839 ± 0.032</p>                                                                                   |
| <p><b>S6J:</b> Behavioral test of TST</p>                                                                                                                                                                          | <p>Unpaired <i>t</i> test</p>                                                                                                                                         |                                                                                                                                                                                                                                                                     | <p><b>Mean ± s.e.m.</b></p>                                                                                                                                      |

|                                                                                                                                        |                                                                |                                                                                                                                                                                                                                                             |                                                                                                                                   |
|----------------------------------------------------------------------------------------------------------------------------------------|----------------------------------------------------------------|-------------------------------------------------------------------------------------------------------------------------------------------------------------------------------------------------------------------------------------------------------------|-----------------------------------------------------------------------------------------------------------------------------------|
| Vehicle (n = 14)<br>CNO (n = 16)                                                                                                       | t = 3.3810, p = 0.0021                                         |                                                                                                                                                                                                                                                             | Vehicle 141.9 ± 7.0<br>CNO 100.6 ± 9.6                                                                                            |
| <b>S6K:</b> Behavioral test of FST<br><br>Vehicle (n = 14)<br>CNO (n = 16)                                                             | Unpaired <i>t</i> test<br><br>t = 3.6550, p = 0.0011           |                                                                                                                                                                                                                                                             | <b>Mean ± s.e.m.</b><br><br>Vehicle 77.8 ± 10.4<br>CNO 34.9 ± 6.1                                                                 |
| <b>S6L:</b> Behavioral test of OFT<br><br>Vehicle (n = 14)<br>CNO (n = 16)                                                             | Unpaired <i>t</i> test<br><br>t = 0.6239, p = 0.5377           |                                                                                                                                                                                                                                                             | <b>Mean ± s.e.m.</b><br><br>Vehicle 37.41 ± 2.25<br>CNO 39.94 ± 3.23                                                              |
| <b>S6M:</b> PDGF-BB mRNA expression in the DG after MS to DG inhibition in the Vgat-Cre mice<br><br>Vehicle (n = 14)<br>CNO (n = 16)   | Unpaired <i>t</i> test<br><br>t = 3.1000, p = 0.0044           |                                                                                                                                                                                                                                                             | <b>Mean ± s.e.m.</b><br><br>Vehicle 1.000 ± 0.059<br>CNO 1.425 ± 0.117                                                            |
| <b>S7B:</b> PDGF-BB protein levels in the DG as determined by ELISA<br><br>AAV-GFP (n = 7)<br>AAV-PDGF-BB (n = 10)                     | Unpaired <i>t</i> test<br><br>t = 4.4140, p = 0.0005           |                                                                                                                                                                                                                                                             | <b>Mean ± s.e.m.</b><br><br>AAV-GFP 164.60 ± 14.73<br>AAV-PDGF-BB 265.60 ± 16.07                                                  |
| <b>S8B:</b> Time spent immobile in the FST<br><br>Vehicle (n = 8)<br>0.0072 µg/mL (n = 8)<br>0.072 µg/mL (n = 8)<br>0.72 µg/mL (n = 7) | One-way ANOVA<br><br>Treatment: F (3, 27) = 2.7560, p = 0.0618 | Tukey's <i>post hoc</i> test<br><br>Vehicle versus 0.0072 µg/mL, p = 0.4412<br>Vehicle versus 0.072 µg/mL, p = 0.6350<br>Vehicle versus 0.72 µg/mL, p = 0.0383<br>0.0072 µg/mL versus 0.072 µg/mL, p = 0.9881<br>0.0072 µg/mL versus 0.72 µg/mL, p = 0.5159 | <b>Mean ± s.e.m.</b><br><br>Vehicle 136.1 ± 5.2<br>0.0072 µg/mL 110.3 ± 16.3<br>0.072 µg/mL 115.8 ± 15.0<br>0.72 µg/mL 85.7 ± 7.5 |

|                                                                                                                                                                                                                               |                                                                       |                                                                                                                                                                                                                                                                                                                      |                                                                                                                                                |
|-------------------------------------------------------------------------------------------------------------------------------------------------------------------------------------------------------------------------------|-----------------------------------------------------------------------|----------------------------------------------------------------------------------------------------------------------------------------------------------------------------------------------------------------------------------------------------------------------------------------------------------------------|------------------------------------------------------------------------------------------------------------------------------------------------|
|                                                                                                                                                                                                                               |                                                                       | 0.072 µg/mL versus 0.72 µg/mL, p = 0.3422                                                                                                                                                                                                                                                                            |                                                                                                                                                |
| <p><b>S8C:</b> Locomotor activity measured by the total distance traveled by the WT mice with vehicle or PDGF-BB treatment</p> <p>Vehicle (n = 8)<br/>0.0072 µg/mL (n = 8)<br/>0.072 µg/mL (n = 8)<br/>0.72 µg/mL (n = 7)</p> | <p>One-way ANOVA</p> <p>Treatment: F (3, 27) = 1.6110, p = 0.2099</p> | <p>Tukey's <i>post hoc</i> test</p> <p>Vehicle versus 0.0072 µg/mL, p = 0.4757<br/>Vehicle versus 0.072 µg/mL, p = 0.9162<br/>Vehicle versus 0.72 µg/mL, p = 0.9996<br/>0.0072 µg/mL versus 0.072 µg/mL, p = 0.1775<br/>0.0072 µg/mL versus 0.72 µg/mL, p = 0.4470<br/>0.072 µg/mL versus 0.72 µg/mL, p = 0.9524</p> | <p><b>Mean ± s.e.m.</b></p> <p>Vehicle 32.60 ± 6.02<br/>0.0072 µg/mL 42.10 ± 4.61<br/>0.072 µg/mL 28.39 ± 3.81<br/>0.72 µg/mL 31.93 ± 3.65</p> |
| <p><b>S9B:</b> PDGF-BB protein levels in the DG as determined by ELISA</p> <p>LV-shGFP (n = 8)<br/>LV-shPDGF-BB (n = 8)</p>                                                                                                   | <p>Unpaired <i>t</i> test</p> <p>t = 4.9140, p = 0.0002</p>           |                                                                                                                                                                                                                                                                                                                      | <p><b>Mean ± s.e.m.</b></p> <p>LV-shGFP 175.0 ± 15.8<br/>LV-shPDGF-BB 90.5 ± 6.7</p>                                                           |
| <p><b>S9C:</b> Behavioral effects of PDGF-BB knockdown in the SIT</p> <p>LV-shGFP (n = 6)<br/>LV-shPDGF-BB (n = 6)</p>                                                                                                        | <p>Unpaired <i>t</i> test</p> <p>t = 0.8668, p = 0.4064</p>           |                                                                                                                                                                                                                                                                                                                      | <p><b>Mean ± s.e.m.</b></p> <p>LV-shGFP 1.252 ± 0.115<br/>LV-shPDGF-BB 1.396 ± 0.120</p>                                                       |
| <p><b>S9D:</b> Behavioral effects of PDGF-BB knockdown in the TST</p> <p>LV-shGFP (n = 6)<br/>LV-shPDGF-BB (n = 6)</p>                                                                                                        | <p>Unpaired <i>t</i> test</p> <p>t = 0.3781, p = 0.7132</p>           |                                                                                                                                                                                                                                                                                                                      | <p><b>Mean ± s.e.m.</b></p> <p>LV-shGFP 134.0 ± 11.2</p>                                                                                       |

|                                                                                                                                                                                    |                                                                                                                                                                            |                                                                                                                                                                                                                                                                           |                                                                                                                                                                    |
|------------------------------------------------------------------------------------------------------------------------------------------------------------------------------------|----------------------------------------------------------------------------------------------------------------------------------------------------------------------------|---------------------------------------------------------------------------------------------------------------------------------------------------------------------------------------------------------------------------------------------------------------------------|--------------------------------------------------------------------------------------------------------------------------------------------------------------------|
|                                                                                                                                                                                    |                                                                                                                                                                            |                                                                                                                                                                                                                                                                           | LV-shPDGF-BB<br>139.5 ± 9.3                                                                                                                                        |
| <b>S9E:</b> Behavioral effects of PDGF-BB knockdown in the FST<br><br>LV-shGFP (n = 6)<br>LV-shPDGF-BB (n = 6)                                                                     | Unpaired <i>t</i> test<br><br>$t = 1.2080, p = 0.2547$                                                                                                                     |                                                                                                                                                                                                                                                                           | <b>Mean ± s.e.m.</b><br><br>LV-shGFP 135.0 ± 8.9<br>LV-shPDGF-BB 122.8 ± 4.7                                                                                       |
| <b>S9F:</b> Behavioral effects of PDGF-BB knockdown in the OFT<br><br>LV-shGFP (n = 6)<br>LV-shPDGF-BB (n = 6)                                                                     | Unpaired <i>t</i> test<br><br>$t = 0.09797, p = 0.9239$                                                                                                                    |                                                                                                                                                                                                                                                                           | <b>Mean ± s.e.m.</b><br><br>LV-shGFP 43.76 ± 6.96<br>LV-shPDGF-BB 43.00 ± 3.51                                                                                     |
| <b>S10C:</b> Quantification of the number of BrdU positive cells<br><br>Control + Vehicle (n = 4)<br>Control + PDGF-BB (n = 4)<br>CSDS + Vehicle (n = 3)<br>CSDS + PDGF-BB (n = 4) | Two-way ANOVA<br><br>Stress: $F(1,11) = 2.7820, p = 0.1235$<br>Treatment: $F(1,11) = 45.0200, p < 0.001$<br>stress × treatment interaction: $F(1,11) = 5.1380, p = 0.0446$ | Bonferroni's <i>post hoc</i> test<br><br>Control + Vehicle versus CSDS + Vehicle, $p = 0.0427$<br>Control + PDGF-BB versus CSDS + PDGF-BB, $p > 0.9999$<br>Control + Vehicle versus Control + PDGF-BB, $p = 0.0149$<br>CSDS + Vehicle versus CSDS + PDGF-BB, $p = 0.0002$ | <b>Mean ± s.e.m.</b><br><br>Control + Vehicle 2334.0 ± 124.7<br>Control + PDGF-BB 3693.0 ± 484.9<br>CSDS + Vehicle 1130.0 ± 15.28<br>CSDS + PDGF-BB 3876.0 ± 256.9 |
| <b>S10D:</b> Quantification of the number of BrdU/DCX positive cells<br><br>Control + Vehicle (n = 4)<br>Control + PDGF-BB (n = 4)<br>CSDS + Vehicle (n = 3)                       | Two-way ANOVA<br><br>Stress: $F(1,11) = 4.6700, p = 0.0536$<br>Treatment: $F(1,11) = 15.4500, p = 0.0024$                                                                  | Bonferroni's <i>post hoc</i> test<br><br>Control + Vehicle versus CSDS + Vehicle, $p = 0.0474$                                                                                                                                                                            | <b>Mean ± s.e.m.</b><br><br>Control + Vehicle 1489.0 ± 58.5<br>Control + PDGF-BB 2038.0 ± 300.2                                                                    |

|                                                                                                                                                                                             |                                                                                                                                                                |                                                                                                                                                                                                                                                                   |                                                                                                                                                                    |
|---------------------------------------------------------------------------------------------------------------------------------------------------------------------------------------------|----------------------------------------------------------------------------------------------------------------------------------------------------------------|-------------------------------------------------------------------------------------------------------------------------------------------------------------------------------------------------------------------------------------------------------------------|--------------------------------------------------------------------------------------------------------------------------------------------------------------------|
| CSDS + PDGF-BB (n = 4)                                                                                                                                                                      | Stress × Treatment: F (1,11) = 2.8500, p = 0.1195                                                                                                              | Control + PDGF-BB versus CSDS + PDGF-BB, p > 0.9999<br>Control + Vehicle versus Control + PDGF-BB, p = 0.2543<br>CSDS + Vehicle versus CSDS + PDGF-BB, p = 0.0056                                                                                                 | CSDS + Vehicle 546.7 ± 73.1<br>CSDS + PDGF-BB 1923.0 ± 326.7                                                                                                       |
| <b>S10F:</b> Quantification of the number of BrdU/Sox2/GFAP positive NSCs<br><br>Control + Vehicle (n = 4)<br>Control + PDGF-BB (n = 4)<br>CSDS + Vehicle (n = 3)<br>CSDS + PDGF-BB (n = 4) | Two-way ANOVA,<br><br>Stress: F (1,11) = 6.1920, p = 0.0301,<br>Treatment: F (1,11) = 27.9000, p = 0.0003<br>Stress × Treatment: F (1,11) = 4.2560, p = 0.0635 | Bonferroni's <i>post hoc</i> test<br><br>Control + Vehicle versus CSDS + Vehicle, p = 0.0202<br>Control + PDGF-BB versus CSDS + PDGF-BB, p > 0.9999<br>Control + Vehicle versus Control + PDGF-BB, p = 0.0744<br>CSDS + Vehicle versus CSDS + PDGF-BB, p = 0.0008 | <b>Mean ± s.e.m.</b><br><br>Control + Vehicle 335.0 ± 8.7<br>Control + PDGF-BB 467.5.0 ± 52.0<br>CSDS + Vehicle 147.7 ± 16.2<br>CSDS + PDGF-BB 450.0 ± 53.1        |
| <b>S10G:</b> Quantification of the number of Sox2/GFAP positive NSCs<br><br>Control + Vehicle (n = 4)<br>Control + PDGF-BB (n = 4)<br>CSDS + Vehicle (n = 3)<br>CSDS + PDGF-BB (n = 4)      | Two-way ANOVA<br><br>Stress: F (1,11) = 0.1566, p = 0.6998<br>Treatment: F (1,11) = 0.009234, p = 0.9252<br>Stress × Treatment: F (1,11) = 1.5270, p = 0.2423  | Bonferroni's <i>post hoc</i> test<br><br>Control + Vehicle versus CSDS + Vehicle, p = 0.5800<br>Control + PDGF-BB versus CSDS + PDGF-BB, p > 0.9999<br>Control + Vehicle versus Control + PDGF-BB, p = 0.6962<br>CSDS + Vehicle versus CSDS + PDGF-BB, p = 0.9077 | <b>Mean ± s.e.m.</b><br><br>Control + Vehicle 5913.0 ± 168.6<br>Control + PDGF-BB 6345.0 ± 202.1<br>CSDS + Vehicle 6442.0 ± 644.1<br>CSDS + PDGF-BB 6072.0 ± 283.3 |

|                                                                                                                                                                                     |                                                                                                                                                                             |                                                                                                                                                                                                                                                                                  |                                                                                                                                                                      |
|-------------------------------------------------------------------------------------------------------------------------------------------------------------------------------------|-----------------------------------------------------------------------------------------------------------------------------------------------------------------------------|----------------------------------------------------------------------------------------------------------------------------------------------------------------------------------------------------------------------------------------------------------------------------------|----------------------------------------------------------------------------------------------------------------------------------------------------------------------|
| <p><b>S10H:</b> The ratio of aNSCs to qNSCs</p> <p>Control + Vehicle (n = 4)<br/>Control + PDGF-BB (n = 4)<br/>CSDS + Vehicle (n = 3)<br/>CSDS + PDGF-BB (n = 4)</p>                | <p>Two-way ANOVA</p> <p>Stress: F (1,11) = 8.1240, p = 0.0158<br/>Treatment: F (1,11) = 32.9000, p = 0.0001<br/>Stress × Treatment: F (1,11) = 8.1270, p = 0.0158</p>       | <p>Bonferroni's <i>post hoc</i> test</p> <p>Control + Vehicle versus CSDS + Vehicle, p = 0.0051<br/>Control + PDGF-BB versus CSDS + PDGF-BB, p &gt; 0.9999<br/>Control + Vehicle versus Control + PDGF-BB, p = 0.1145<br/>CSDS + Vehicle versus CSDS + PDGF-BB, p = 0.0002</p>   | <p><b>Mean ± s.e.m.</b></p> <p>Control + Vehicle 1.00 ± 0.02<br/>Control + PDGF-BB 1.30 ± 0.15<br/>CSDS + Vehicle 0.40 ± 0.01<br/>CSDS + PDGF-BB 1.30 ± 0.12</p>     |
| <p><b>S10K:</b> Quantification of the branch number</p> <p>Control + Vehicle (n = 27)<br/>Control + PDGF-BB (n = 24)<br/>CSDS + Vehicle (n = 26)<br/>CSDS + PDGF-BB (n = 24)</p>    | <p>Two-way ANOVA</p> <p>Stress: F (1,97) = 3.4990, p = 0.0644<br/>Treatment: F (1,97) = 19.9200, p &lt; 0.001<br/>Stress × Treatment: F (1,97) = 6.8190, p = 0.0105</p>     | <p>Bonferroni's <i>post hoc</i> test</p> <p>Control + Vehicle versus CSDS + Vehicle, p = 0.0032<br/>Control + PDGF-BB versus CSDS + PDGF-BB, p &gt; 0.9999<br/>Control + Vehicle versus Control + PDGF-BB, p = 0.3830<br/>CSDS + Vehicle versus CSDS + PDGF-BB, p &lt; 0.001</p> | <p><b>Mean ± s.e.m.</b></p> <p>Control + Vehicle 4.7 ± 0.3<br/>Control + PDGF-BB 5.3 ± 0.4<br/>CSDS + Vehicle 3.2 ± 0.3<br/>CSDS + PDGF-BB 5.5 ± 0.4</p>             |
| <p><b>S10L:</b> Quantification of the dendritic length</p> <p>Control + Vehicle (n = 27)<br/>Control + PDGF-BB (n = 24)<br/>CSDS + Vehicle (n = 26)<br/>CSDS + PDGF-BB (n = 24)</p> | <p>Two-way ANOVA</p> <p>Stress: F (1, 97) = 1.1470, p = 0.2869<br/>Treatment: F (1,97) = 16.8100, p &lt; 0.001<br/>Stress × Treatment: F (1,97) = 18.4500, p &lt; 0.001</p> | <p>Bonferroni's <i>post hoc</i> test</p> <p>Control + Vehicle versus CSDS + Vehicle, p = 0.0004<br/>Control + PDGF-BB versus CSDS + PDGF-BB, p = 0.0567<br/>Control + Vehicle versus Control + PDGF-BB, p &gt; 0.9999</p>                                                        | <p><b>Mean ± s.e.m.</b></p> <p>Control + Vehicle 635.4 ± 32.4<br/>Control + PDGF-BB 628.9 ± 30.1<br/>CSDS + Vehicle 455.8 ± 35.9<br/>CSDS + PDGF-BB 736.8 ± 34.5</p> |

|                                                                                                                                                                       |                                                               | CSDS + Vehicle versus<br>CSDS + PDGF-BB,<br>p < 0.001 |                                                                                                                                                                                |
|-----------------------------------------------------------------------------------------------------------------------------------------------------------------------|---------------------------------------------------------------|-------------------------------------------------------|--------------------------------------------------------------------------------------------------------------------------------------------------------------------------------|
| <p><b>S11A:</b> The protein levels of PDGFR<math>\beta</math> in the DG after CSDS</p> <p>Control (n = 7)<br/>CSDS (n = 6)</p>                                        | <p>Unpaired <i>t</i> test</p> <p>t = 3.3470, p = 0.0065</p>   |                                                       | <p><b>Mean <math>\pm</math> s.e.m.</b></p> <p>CSDS 1.00 <math>\pm</math> 0.06<br/>CSDS 0.67 <math>\pm</math> 0.08</p>                                                          |
| <p><b>S11E:</b> Quantification of PDGFR<math>\beta</math> neurons colocalized with GFP</p> <p>AAV-DIO-shGFP (n = 9)<br/>AAV-DIO-shPDGFR<math>\beta</math> (n = 9)</p> | <p>Unpaired <i>t</i> test</p> <p>t = 6.7530, p &lt; 0.001</p> |                                                       | <p><b>Mean <math>\pm</math> s.e.m.</b></p> <p>AAV-DIO-shGFP<br/>22.510 <math>\pm</math> 1.263<br/>AAV-DIO<br/>shPDGFR<math>\beta</math> 12.000<br/><math>\pm</math> 0.910</p>  |
| <p><b>S11G:</b> Quantification of the number of BrdU positive cells</p> <p>AAV-DIO-shGFP (n = 4)<br/>AAV-DIO-shPDGFR<math>\beta</math> (n = 4)</p>                    | <p>Unpaired <i>t</i> test</p> <p>t = 4.2070, p = 0.0056</p>   |                                                       | <p><b>Mean <math>\pm</math> s.e.m.</b></p> <p>AAV-DIO-shGFP<br/>2489.0 <math>\pm</math> 309.1<br/>AAV-DIO-<br/>shPDGFR<math>\beta</math> 1081.0 <math>\pm</math><br/>127.9</p> |
| <p><b>S11H:</b> Quantification of the number of BrdU/Sox2/GFAP positive NSCs</p> <p>AAV-DIO-shGFP (n = 4)<br/>AAV-DIO-shPDGFR<math>\beta</math> (n = 4)</p>           | <p>Unpaired <i>t</i> test</p> <p>t = 3.6070, p = 0.0113</p>   |                                                       | <p><b>Mean <math>\pm</math> s.e.m.</b></p> <p>AAV-DIO-shGFP<br/>331.5 <math>\pm</math> 35.8<br/>AAV-DIO-<br/>shPDGFR<math>\beta</math> 173.3 <math>\pm</math><br/>25.4</p>     |
| <p><b>S11I:</b> The ratio of aNSCs to qNSCs</p> <p>AAV-DIO-shGFP (n = 4)<br/>AAV-DIO-shPDGFR<math>\beta</math> (n = 4)</p>                                            | <p>Unpaired <i>t</i> test</p> <p>t = 2.4610, p = 0.0491</p>   |                                                       | <p><b>Mean <math>\pm</math> s.e.m.</b></p> <p>AAV-DIO-shGFP<br/>1.00 <math>\pm</math> 0.21</p>                                                                                 |

|                                                                                                                                     |                                                      |  |                                                                                                                          |
|-------------------------------------------------------------------------------------------------------------------------------------|------------------------------------------------------|--|--------------------------------------------------------------------------------------------------------------------------|
|                                                                                                                                     |                                                      |  | AAV-DIO-shPDGF $\beta$ 0.45 $\pm$ 0.08                                                                                   |
| <b>S11J:</b> Quantification of the number of Sox2/GFAP positive NSCs<br><br>AAV-DIO-shGFP (n = 4)<br>AAV-DIO-shPDGFR $\beta$ (n =4) | Unpaired <i>t</i> test<br><br>t = 0.5874, p = 0.5783 |  | <b>Mean <math>\pm</math> s.e.m.</b><br><br>AAV-DIO-shGFP 6490.0 $\pm$ 819.9<br>AAV-DIO-shPDGF $\beta$ 7003.0 $\pm$ 300.8 |
| <b>S12F:</b> The protein levels of JAK2 in the DG after PDGF-BB treatment<br><br>Vehicle (n = 10)<br>PDGF-BB (n = 10)               | Unpaired <i>t</i> test<br><br>t = 3.4140, p = 0.0031 |  | <b>Mean <math>\pm</math> s.e.m.</b><br><br>Vehicle 1.00 $\pm$ 0.05<br>PDGF-BB 1.38 $\pm$ 0.10                            |
| <b>S12G:</b> The protein levels of STAT3 in the DG after PDGF-BB treatment<br><br>Vehicle (n = 10)<br>PDGF-BB (n = 10)              | Unpaired <i>t</i> test<br><br>t = 3.6090, p = 0.0020 |  | <b>Mean <math>\pm</math> s.e.m.</b><br><br>Vehicle 1.00 $\pm$ 0.06<br>PDGF-BB 1.30 $\pm$ 0.06                            |
| <b>S12I:</b> The protein levels of JAK2 in the DG after PDGF-BB treatment<br><br>Vehicle (n = 9)<br>PDGF-BB (n = 9)                 | Unpaired <i>t</i> test<br><br>t = 3.1210, p = 0.0066 |  | <b>Mean <math>\pm</math> s.e.m.</b><br><br>Vehicle 1.00 $\pm$ 0.06<br>PDGF-BB 1.52 $\pm$ 0.16                            |
| <b>S12J:</b> The protein levels of STAT3 in the DG after PDGF-BB treatment<br><br>Vehicle (n = 9)<br>PDGF-BB (n = 9)                | Unpaired <i>t</i> test<br><br>t = 2.6550, p = 0.0173 |  | <b>Mean <math>\pm</math> s.e.m.</b><br><br>Vehicle 1.00 $\pm$ 0.03<br>PDGF-BB 1.18 $\pm$ 0.06                            |
